# 1 Pseudohypoxic HIF pathway activation dysregulates collagen structure- 2 function in human lung fibrosis

3 Christopher Brereton<sup>1,2,12</sup>, Liudi Yao<sup>3,12</sup>, Yilu Zhou<sup>3,4</sup>, Milica Vukmirovic<sup>5</sup>, Joseph Bell<sup>1,2</sup>, Robert  
4 A. Ridley<sup>1,2</sup>, Elizabeth R. Davies<sup>1,2</sup>, Lareb S.N. Dean<sup>1,2</sup>, Orestis G. Andriotis<sup>6</sup>, Franco Conforti<sup>1,2</sup>,  
5 Soran Mohammed<sup>7</sup>, Tim Wallis<sup>1,2</sup>, Ali Tavassoli<sup>7</sup>, R. Ewing<sup>3,4</sup>, Aiman Alzetani<sup>2,8</sup>, Ben G.  
6 Marshall<sup>2,8</sup>, Sophie V. Fletcher<sup>2,8</sup>, Phillipp J. Thurner<sup>6</sup>, Aurelie Fabre<sup>9</sup>, Naftali Kaminski<sup>5</sup>, Luca  
7 Richeldi<sup>1,2,10</sup>, Atul Bhaskar<sup>11</sup>, Matthew Loxham<sup>1,2,4</sup>, Donna E. Davies<sup>1,2,4</sup>, Yihua Wang<sup>2,3,4,13</sup>, and  
8 Mark G. Jones<sup>1,2,4,13</sup>

9

10 <sup>1</sup>Clinical and Experimental Sciences, Faculty of Medicine, University of Southampton,  
11 Southampton SO16 6YD, UK.

12 <sup>2</sup>NIHR Southampton Biomedical Research Centre, University Hospital Southampton,  
13 Southampton SO16 6YD, UK.

14 <sup>3</sup>Biological Sciences, Faculty of Environmental and Life Sciences, University of Southampton,  
15 Southampton SO17 1BJ, UK.

16 <sup>4</sup>Institute for Life Sciences, University of Southampton, Southampton SO17 1BJ, UK.

17 <sup>5</sup>Section of Pulmonary, Critical Care and Sleep Medicine, Department of Medicine, Yale  
18 University School of Medicine, New Haven, Connecticut, USA

19 <sup>6</sup>Institute for Lightweight Design and Structural Biomechanics, Vienna University of  
20 Technology, Gumpendorfer Strasse 7, Austria,

21 <sup>7</sup>School of Chemistry, University of Southampton, Southampton SO17 1BJ, UK.

22 <sup>8</sup>University Hospital Southampton, Southampton SO16 6YD, UK.

1 <sup>9</sup>Department of Histopathology, St. Vincent's University Hospital & UCD School of Medicine,  
2 University College Dublin, Dublin, Ireland

3 <sup>10</sup>Unità Operativa Complessa di Pneumologia, Università Cattolica del Sacro Cuore,  
4 Fondazione Policlinico A. Gemelli, Rome, Italy.

5 <sup>11</sup>Aeronautics, Astronautics and Computational Engineering, Faculty of Engineering and the  
6 Environment, University of Southampton, Southampton, United Kingdom

7 <sup>12</sup>These authors contributed equally to this work.

8 <sup>13</sup>Correspondence should be addressed to MGJ ([mark.jones@soton.ac.uk](mailto:mark.jones@soton.ac.uk)) or YW (e-mail:  
9 [yihua.wang@soton.ac.uk](mailto:yihua.wang@soton.ac.uk))

10

1 **Abstract**

2 Extracellular matrix (ECM) stiffening with downstream activation of mechanosensitive  
3 pathways is strongly implicated in fibrosis. We previously reported that altered collagen  
4 nanoarchitecture is a key determinant of pathogenetic ECM structure-function in human  
5 fibrosis (Jones et al., 2018). Here, through human tissue, bioinformatic and *ex vivo* studies we  
6 show that hypoxia-inducible factor (HIF) pathway activation is a critical pathway for this  
7 process regardless of oxygen status (pseudohypoxia). Whilst TGF $\beta$  increased rate of fibrillar  
8 collagen synthesis, HIF pathway activation was required to dysregulate post-translational  
9 modification of fibrillar collagen, promoting ‘bone-type’ cross-linking, altering collagen  
10 nanostructure, and increasing tissue stiffness. *In vitro*, knock down of Factor Inhibiting HIF  
11 (FIH) or oxidative stress caused pseudohypoxic HIF activation in normal fibroblasts. In contrast,  
12 endogenous FIH activity was reduced in fibroblasts from patients with lung fibrosis in  
13 association with significantly increased normoxic HIF pathway activation. In human lung  
14 fibrosis tissue, HIF mediated signalling was increased at sites of active fibrogenesis whilst  
15 subpopulations of IPF lung mesenchymal cells had increases in both HIF and oxidative stress  
16 scores. Our data demonstrate that oxidative stress can drive pseudohypoxic HIF pathway  
17 activation which is a critical regulator of pathogenetic collagen structure-function in fibrosis.

18

19

20

21

22

## 1 **Introduction**

2 We previously identified that in the lung tissue of patients with idiopathic pulmonary fibrosis  
3 (IPF) there is increased ‘bone-type’ pyridinoline collagen cross-linking and altered collagen  
4 fibril nano-architecture, with individual collagen fibrils being structurally and functionally  
5 abnormal<sup>1</sup>. This was associated with increased tissue expression of lysyl hydroxylase 2  
6 (LH2/PLOD2, which catalyses telopeptide lysine hydroxylation to determine pyridinoline  
7 cross-linking) and the lysyl oxidase-like (LOXL) enzymes LOXL2 and LOXL3, which initiate  
8 covalent collagen cross-linking<sup>1</sup>. This ‘bone-type’ pyridinoline cross-linking, rather than any  
9 change in collagen deposition per se, determined increased IPF tissue stiffness. Inhibiting  
10 ‘bone-type’ cross-linking normalised mechano-homeostasis and limited the self-sustaining  
11 effects of ECM on fibrosis progression. Whilst identifying the importance of altered collagen  
12 nanoarchitecture to human lung fibrosis pathogenesis, the upstream mechanisms that  
13 dysregulate collagen structure-function to promote progressive fibrosis rather than tissue  
14 repair were not determined. Here, we investigated possible mechanisms and established  
15 their relevance to human lung fibrosis.

## 1 Results

### 2 The 'bone-type' collagen fibrillogenesis genes PLOD2 and LOXL2 are co-expressed at sites of 3 active fibrogenesis

4 In our previous work comparing human IPF lung tissue with age-matched control lung tissue,  
5 we identified that in bulk IPF lung tissue lysates there are significant increases in the relative  
6 expression of the collagen modifying enzymes *LOXL2*, *LOXL3*, and *LOXL4*, as well as *PLOD2*  
7 (also known as lysyl hydroxylase or LH2)<sup>1</sup>. To further investigate this observation, we firstly  
8 studied the transcriptomic profiles of fibroblast foci, the sites of active fibrogenesis in IPF. We  
9 analysed a data set we recently generated by integrating laser-capture-microdissection and  
10 RNA-Seq (LCMD/RNA-seq) which enabled profiling of the *in situ* transcriptome of fibroblast  
11 foci as well as alveolar septae from control tissue and IPF tissue (Gene Expression Omnibus  
12 (GEO) GSE169500). The LOXL enzyme with the greatest expression in fibroblast foci was *LOXL2*  
13 (Fig. 1a-e). Whilst *LOXL3* and *LOXL4* expression was increased within fibroblast foci, only  
14 limited expression was identified (Fig. 1d and e). Furthermore, *PLOD2* expression was  
15 significantly increased within fibroblast foci (Fig. 1f), and *PLOD2* expression correlated ( $r=0.63$ ,  
16  $p=0.04$ ) with *LOXL2* (Fig. 1g) but not other LOXL enzymes (Supplementary Figure 1a-d),  
17 suggesting possible co-ordinated regulation of *PLOD2* and *LOXL2* gene expression. In contrast,  
18 expression of the major collagen fibrillogenesis gene *COL1A1* did not significantly correlate  
19 with their expression (Supplementary Fig. 1e), suggesting that, in lung fibrosis, distinct  
20 pathways might promote pyridinoline cross-linking to dysregulate collagen fibril nano-  
21 structure independently of pathways regulating major fibrillar collagen synthesis. We then  
22 performed RNA *in situ* hybridisation upon IPF lung tissue, confirming that the greatest  
23 expression of *LOXL2* and *PLOD2* in IPF tissue was by mesenchymal cells within fibroblast foci,  
24 and that *LOXL2* and *PLOD2* were co-expressed within the same cells (Fig. 1h).

1 **Figure 1. The collagen cross-linking enzymes PLOD2 and LOXL2 are co-expressed at sites of**  
 2 **active fibrogenesis in IPF.**  
 3 (A-F) Expression of *LOX*, *LOXL1*, *LOXL2*, *LOXL3*, *LOXL4* and *PLOD2* in healthy alveolar septae,  
 4 IPF alveolar septae and IPF fibroblast foci (n= 10 individual healthy and IPF donors). Relative  
 5 expression levels are calculated as Fragments Per Kilobase of transcript per Million mapped  
 6 reads (FPKM). Bars represent standard geometric means. \*p<0.05; \*\*p<0.01; \*\*\*p<0.001;  
 7 \*\*\*\*p<0.0001 by Tukey's multiple comparisons test. (G) Scatterplot of paired fibroblast foci  
 8 data from (C) and (F) were plotted to compare expression of PLOD2 and LOXL2 (Spearman  
 9 correlation coefficient  $r=0.63$ ,  $p=0.04$ ). (H) Representative mRNA expression of *PLOD2* (red  
 10 chromagen) and *LOXL2* (green chromagen) in IPF lung tissue using RNAscope® RNA in-situ  
 11 hybridisation. A fibroblastic focus is identified by \* and arrows identify co-expression pattern.  
 12 Left scale bar 100  $\mu$ m, right scale bar 20  $\mu$ m.  
 13

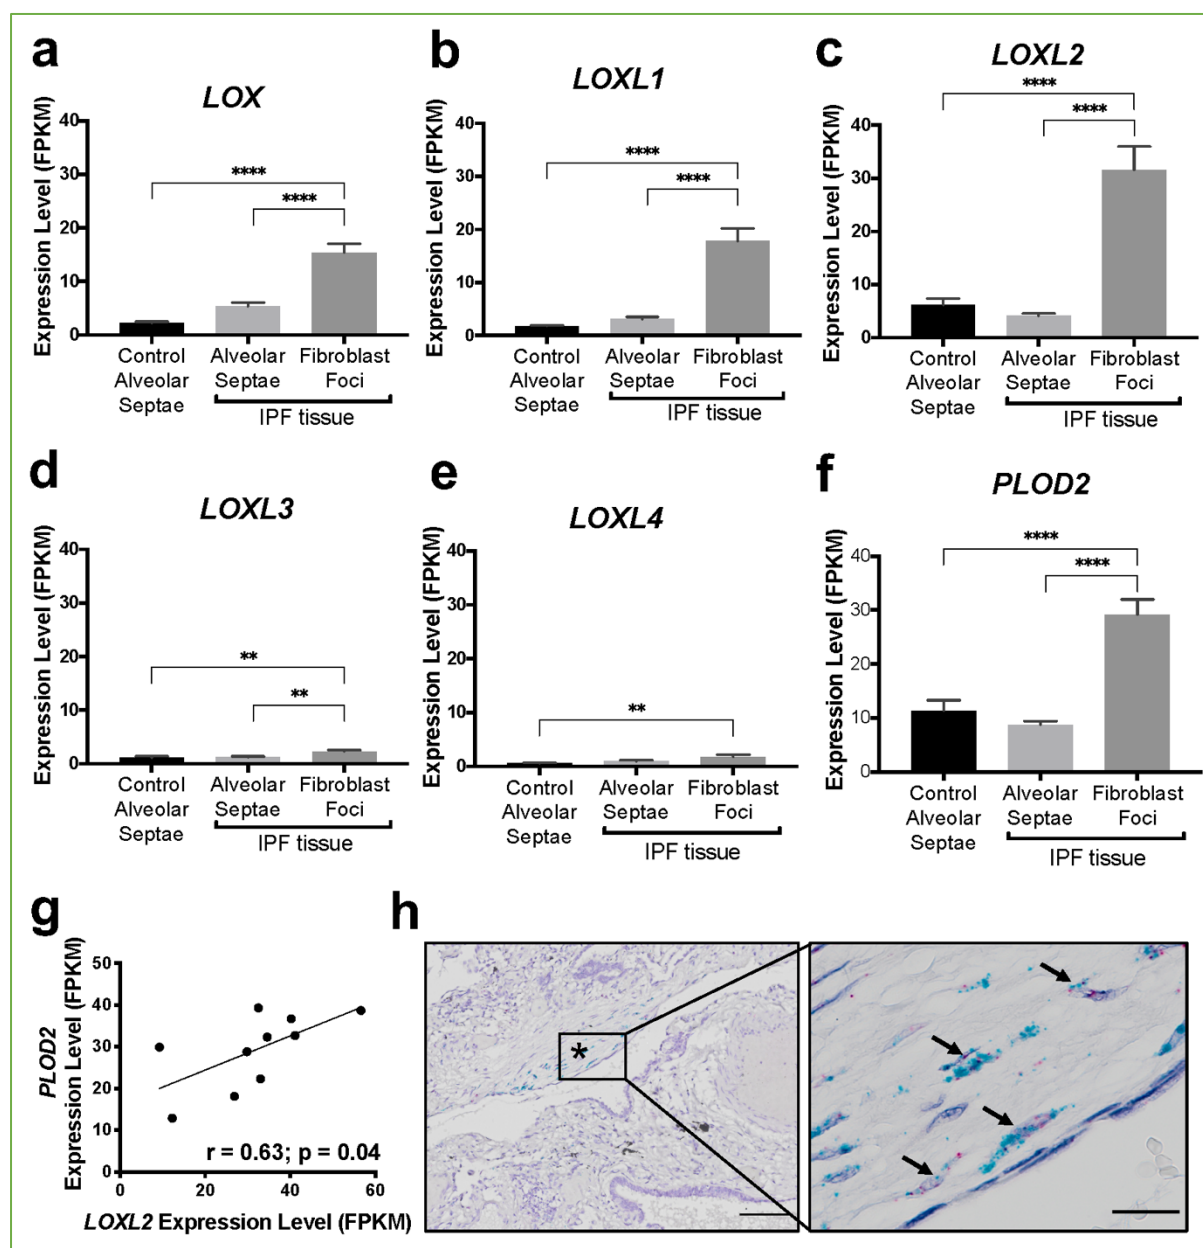

1 *HIF pathway activation is a key inducer of PLOD2 and LOXL2 expression in lung fibroblasts*

2 To investigate common regulators of *PLOD2* and *LOXL2* in lung fibrosis, we studied their  
3 expression in primary human lung fibroblasts over a 72 hour time course following activation  
4 (Supplementary Fig. 2a) of transforming growth factor beta (TGF $\beta$ ), epidermal growth factor  
5 (EGF), hypoxia inducible factors (HIF) or Wnt signalling pathways, each of which have been  
6 implicated in fibrogenesis<sup>2-7</sup>. The hypoxia mimetic dimethyloxallylglycine (DMOG)<sup>8</sup>, a prolyl  
7 hydroxylase inhibitor that stabilises HIF1 $\alpha$  and HIF2 $\alpha$ , most strongly upregulated both *PLOD2*  
8 and *LOXL2* gene and protein expression (Fig. 2a-c) but did not induce expression of interstitial  
9 collagen genes (*COL1A1*, *COL3A1*) (Fig. 2d and Supplementary Fig. 2b). In contrast, TGF $\beta$ 1  
10 strongly induced *COL1A1* and *COL3A1* and this was associated with a smaller up-regulation of  
11 *PLOD2* at 24 hours and of *LOXL2* at 72 hours (Fig. 2a-d; Supplementary Fig. 2b). No induction  
12 of *PLOD2* or *LOXL2* was identified with canonical Wnt (Wnt3a), non-canonical Wnt (Wnt5a)  
13 or EGF pathway activation (Fig. 2a-c). We further extended these observations by showing  
14 that treatment with the HIF $\alpha$  selective prolyl 2-hydroxylase inhibitor, N-[[1,2-Dihydro-4-  
15 hydroxy-2-oxo-1-(phenylmethyl)-3-quinolinyl]carbonyl]-glycine (IOX2)<sup>8</sup> or culture for 24h  
16 under hypoxic conditions induced expression of *PLOD2* and *LOXL2* (Supplementary Fig. 2c-d),  
17 with immunofluorescent staining confirming an increase in intracellular *LOXL2* expression  
18 following DMOG or IOX2 treatment in comparison to treatment with TGF $\beta$ 1 (Fig. 2e).

1 **Figure 2. Hypoxia mimetics strongly promote PLOD2 and LOXL2 expression in lung**  
 2 **fibroblasts.**  
 3 (A-B, D) Relative gene expression using the  $\Delta\Delta C_t$  method of *PLOD2*, *LOXL2* and *COL1A1* in  
 4 healthy lung fibroblasts over a 72 hour time course in the presence of EGF, TGF $\beta$ 1, the hypoxia  
 5 mimetic DMOG, Wnt3a, Wnt5a, or vehicle control. n=3 independent experiments. Bars  
 6 indicate geometric means. \*p<0.05; \*\*\*p<0.001; \*\*\*\*p<0.0001 by Dunnett's multiple  
 7 comparisons test. (C) Protein expression of PLOD2 and LOXL2 at 72 hours.  $\beta$ -actin loading  
 8 control. The full blots are shown in Figure 2-source data 1. (E) Representative  
 9 immunofluorescence images of healthy lung fibroblasts fixed after 24 hr and stained for  
 10 LOXL2 (green), phalloidin (red) and DAPI (blue). Scale bar 50  $\mu$ m.  
 11

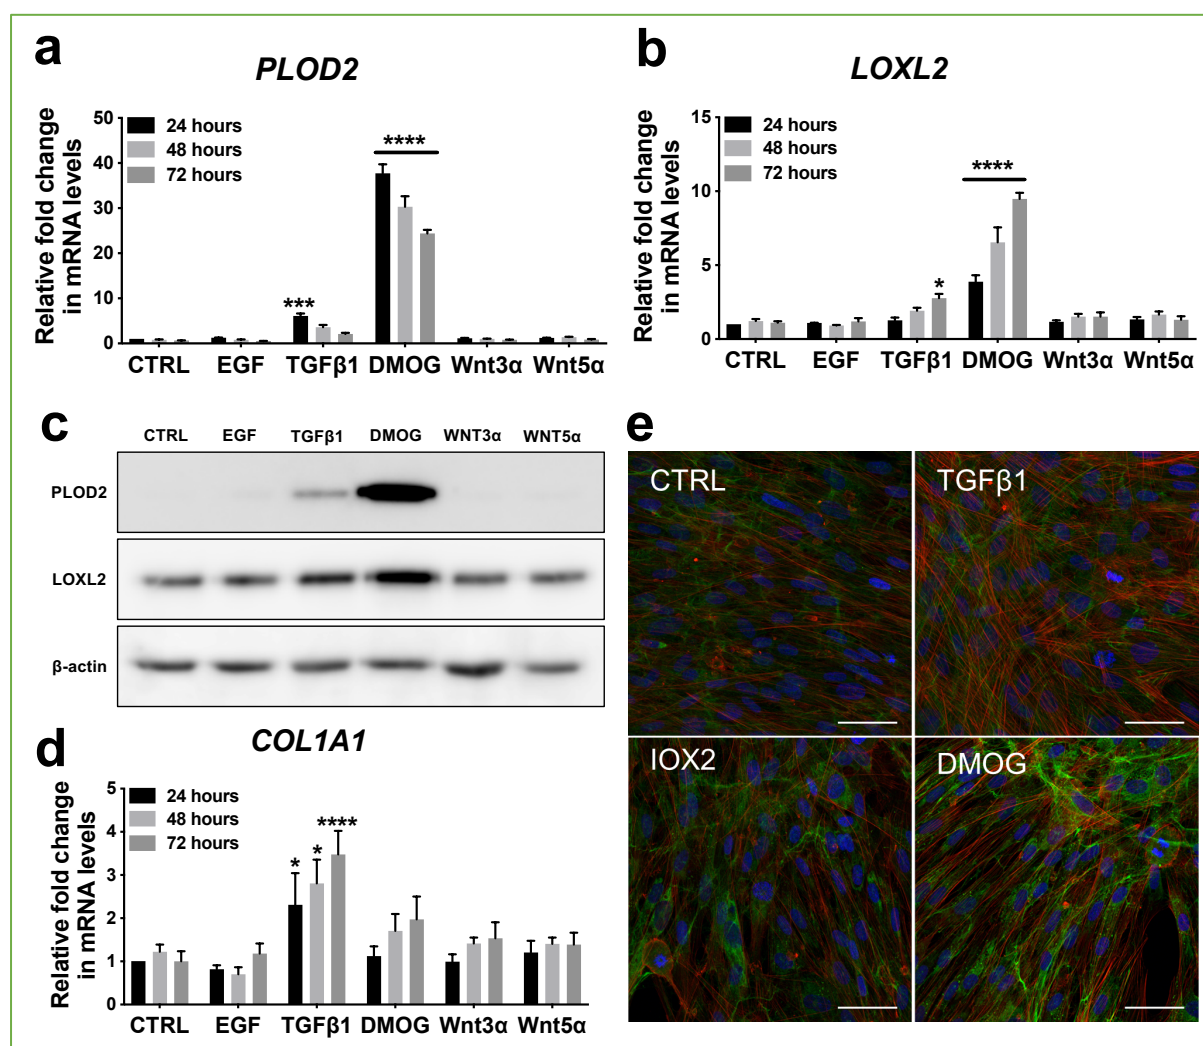



1 Transcriptional activation of HIF pathways requires assembly of a heterodimer between  
2 HIF1 $\alpha$  or HIF2 $\alpha$  and their obligate binding partner HIF1 $\beta$ <sup>9, 10</sup>. To confirm the dependence of  
3 the induction of PLOD2 and LOXL2 expression upon HIF pathways, siRNA knockdown against  
4 HIF1 $\alpha$ , HIF2 $\alpha$ , and HIF1 $\beta$  was performed (Fig. 3a). The knockdown of HIF1 $\alpha$ , but not HIF2 $\alpha$   
5 prevented DMOG induction of PLOD2 mRNA and protein expression, whilst LOXL2 required  
6 silencing of both HIF1 $\alpha$  and HIF2 $\alpha$  or HIF1 $\beta$  (Fig. 3b-d). Together, these findings identify that  
7 HIF stabilisation is required to orchestrate induction of *PLOD2* and *LOXL2* gene expression in  
8 human lung fibroblasts.

9

1 **Figure 3. HIF pathway activation regulates PLOD2 and LOXL2 expression in lung fibroblasts**  
 2 **from patients with IPF.**

3 (A) Fold change in mRNA levels of *HIF1α*, *HIF2α*, and *HIF1β* in primary human lung fibroblasts  
 4 from patients with IPF transfected with indicated SiRNA followed by treatment with DMOG.  
 5  $\beta$ -actin-normalised mRNA levels in control cells were used to set the baseline value at unity.  
 6 Data are mean  $\pm$  s.d. n = 3 samples per group. (B, C) Fold change in mRNA levels of *LOXL2* (B)  
 7 and *PLOD2* (C) in IPF fibroblasts transfected with indicated siRNA followed by treatment with  
 8 DMOG or vehicle control.  $\beta$ -actin-normalised mRNA levels in control cells were used to set  
 9 the baseline value at unity. Data are mean  $\pm$  s.d. n = 3 samples per group. ns (not significant,  
 10  $p > 0.05$ ); \* $p < 0.05$ ; \*\*\*\* $p < 0.0001$  by Dunnett's multiple comparisons test. (D) Protein  
 11 expression of PLOD2, LOXL2 and HIF1 $\alpha$  and  $\beta$ -tubulin in IPF fibroblasts transfected with  
 12 indicated siRNA followed by treatment of DMSO or DMOG.  $\beta$ -tubulin was used as a loading  
 13 control. The full blots are shown in Figure 3-source data 1.

14  
 15

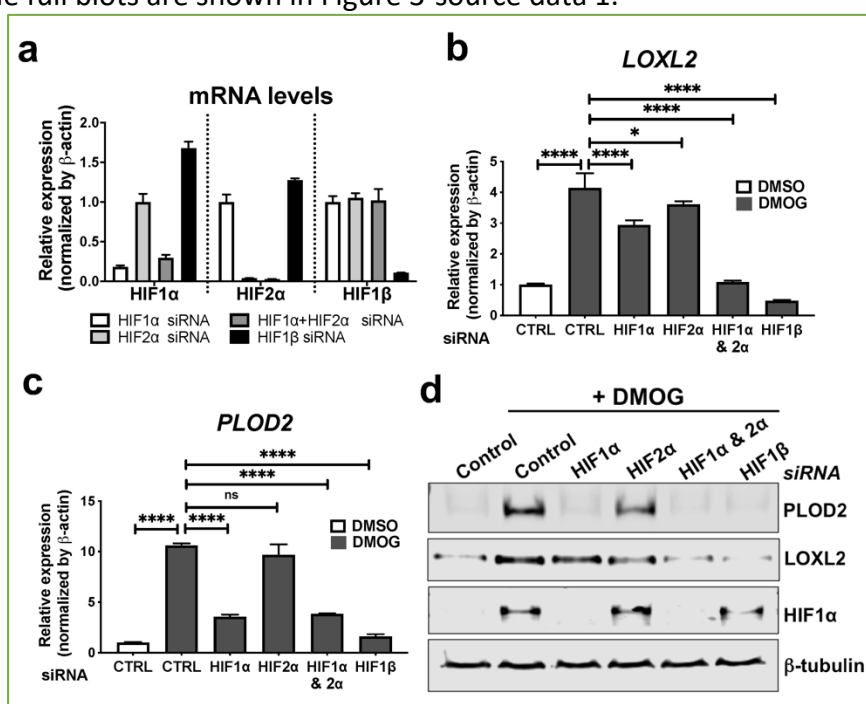

1 *HIF pathway activation and TGFβ1 synergistically increase PLOD2 expression*

2 Given that TGFβ1 strongly induced major collagen fibrillogenesis genes whilst HIF pathways  
3 most strongly induced PLOD2 and LOXL2 expression, we investigated the effects of activating  
4 these pathways individually or in combination using lung fibroblasts from patients with IPF.  
5 The effect of DMOG or IOX2 in the presence or absence of TGFβ1 upon PLOD2 and LOXL2  
6 induction was comparable to that identified using normal control lung fibroblasts (Fig. 4a-c).  
7 When combined, a synergistic effect upon the induction of PLOD2 expression was apparent  
8 which was greater than either pathway alone (Fig. 4a and b), whilst TGFβ1 alone was sufficient  
9 to induce interstitial collagen gene (*COL1A1*) expression (Supplementary Figure 3). HIF  
10 stabilisation significantly increased the ratio of *PLOD2* and *LOXL2* gene expression relative to  
11 fibrillar collagen (*COL1A1*) gene expression while TGFβ1 did not (Fig. 4d-e), suggesting that  
12 TGFβ activity alone may be insufficient to promote the altered collagen cross-linking that is  
13 present in IPF lung tissue. Together these findings identify that whilst TGFβ1 has a dominant  
14 role in increasing the rate of synthesis of major fibrillar collagens, HIF pathways may have a  
15 key role in regulating pathological post-translational modifications and collagen structure in  
16 lung fibrosis.

17

18 *HIF pathway activation alters collagen structure-function and increases tissue stiffness*

19 To investigate whether HIF pathway activation acts as a 'second hit' to drive pathologic  
20 collagen crosslinking by disproportionate induction of 'bone-type' collagen-modifying  
21 enzymes relative to TGFβ-induced collagen fibril synthesis, we employed our long-term 3D *in*  
22 *vitro* model of lung fibrosis using primary human lung fibroblasts from patients with IPF, so  
23 allowing direct evaluation of pyridinoline cross-linking, collagen nanostructure, and tissue  
24 biomechanics<sup>1</sup>. We employed the selective HIF-prolyl hydroxylase 2 inhibitor IOX2 to test

1 **Figure 4. HIF pathway activation promotes increased pyridinoline post-translational gene**  
 2 **modification expression relative to fibrillar collagen expression**

3 (A) Protein expression of PLOD2, LOXL2 and HIF1 $\alpha$ , phospho-Smad2 (p-Smad2) and  $\beta$ -tubulin  
 4 in primary human lung fibroblasts from patients with IPF cultured in the presence of DMOG,  
 5 IOX2, or vehicle control in the absence or presence of TGF $\beta$ 1 for 48 hours.  $\beta$ -tubulin was used  
 6 as a loading control. The full blots are shown in Figure 4-source data 1. (B-C) Relative gene  
 7 expression of *PLOD2* and *LOXL2* was investigated in lung fibroblasts from IPF donors (n=3  
 8 across 2 independent experiments) exposed to 48 hours of media control, TGF $\beta$ 1, DMOG or  
 9 combined TGF $\beta$ 1 and DMOG conditions using the  $\Delta\Delta$ Ct method. Bars indicate geometric  
 10 means. Data are mean  $\pm$  s.d. \*\*p<0.01; \*\*\*p<0.001; \*\*\*\*p<0.0001 by Dunnett's multiple  
 11 comparisons test. (D-G) Expression of *PLOD2* and *LOXL2* from (B-C) was divided by *COL1A1*  
 12 expression (shown in Supplementary Fig. 3) to calculate proportionate expression changes of  
 13 cross-linking enzymes relative to collagen fibrillogenesis gene expression. Bars indicate  
 14 geometric mean. Grouped analysis was performed using Dunnett's multiple comparison test.  
 15 \*\* p < 0.01, \*\*\* p < 0.001  
 16

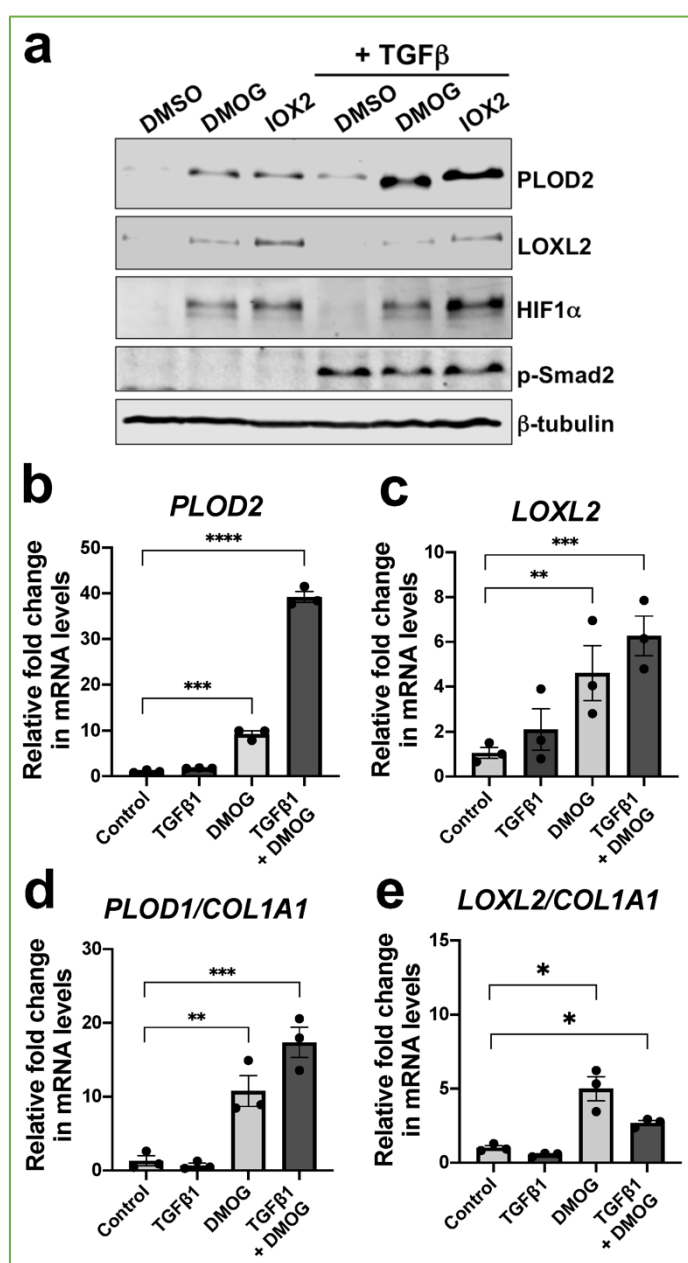

1 within the *in vitro* fibrosis model, confirming HIF stabilisation by IOX2 following 2-week  
2 culture, and that in combination with TGF $\beta$ 1 this promoted PLOD2 and LOXL2 expression  
3 (Supplementary Fig. 4). Following 6 weeks of culture with TGF $\beta$ 1 in the absence (control) or  
4 presence of IOX2 to drive HIF pathway activation, mature pyridinoline cross links (DPD/PYD)  
5 were significantly increased by the addition of IOX2 (Fig. 5a) and these achieved a level  
6 comparable to our previous findings in IPF tissue<sup>1</sup>. The biomechanical consequence of HIF  
7 stabilisation by IOX2 treatment was then investigated with parallel plate compression testing,  
8 identifying a greater than 3-fold increase in tissue stiffness by the addition of IOX2 (Fig. 5b),  
9 with the mean ( $\pm$  SEM) compressive modulus measurement following IOX2 treatment of  
10 (107.1  $\pm$ 10.7) kPa comparable to the maximal stiffness of between 50 and 150 kPa we and  
11 others have previously identified in highly fibrotic areas in IPF tissue<sup>11</sup>.

12 We next assessed collagen morphology. When visualised by polarised light Picrosirius red  
13 microscopy (Fig. 5c), highly organised collagen fibrils were evident in vehicle-treated fibrotic  
14 control cultures as well as in those treated with IOX2 with no apparent morphological  
15 differences. In contrast ultrastructural analysis of the collagen fibrils using electron  
16 microscopy identified a change in collagen nanostructure with a significant decrease in fibril  
17 diameter (Fig. 5d and e) when pyridinoline cross-linking was increased by IOX2, consistent  
18 with our previous observation that fibril diameter is increased by inhibition of pyridinoline  
19 cross-linking<sup>1</sup>. In support of the disease relevance of our *in vitro* findings, non-hydrated  
20 collagen fibrils from patients with IPF have reduced diameters when measured by atomic  
21 force microscopy (Fig. 5f), consistent with our previous findings that hydrated collagen fibrils  
22 extracted from IPF lung tissue have a reduced diameter compared to control samples<sup>1</sup>.

23 Together, these data identify HIF pathway activation to be a key regulator of pyridinoline  
24 cross-link density, collagen fibril nano-architecture, and tissue stiffness.

1 **Figure 5. HIF pathway activation promotes pyridinoline cross-linking, alters collagen nano-**  
2 **architecture, and increases tissue stiffness**

3 Lung fibroblasts from IPF patients (n = 3 donors, two experiments per donor) were used in  
4 the 3D model of fibrosis in the presence of IOX2 or vehicle control as indicated. Bars indicate  
5 geometric mean  $\pm$  s.e.m. Analysis was performed using a Mann-Whitney t-test (2-tailed)  
6 \*\*p<0.01; \*\*\*p<0.001; \*\*\*\*p<0.0001. (A) Total mature trivalent (PYD + DPD) collagen cross-  
7 links determined by ELISA. n= 6 samples from 3 IPF donors. (B) Tissue stiffness measured from  
8 parallel-plate compression testing (n = 12 samples from 3 IPF donors) determined by Young's  
9 modulus and represented as proportion of control. (C) Representative images of histological  
10 sections of samples stained with picosirius red and imaged under polarised light. Scale bar  
11 20  $\mu$ m. (D) Representative electron microscopy images of collagen fibrils. Scale bar 50 nm. (E)  
12 Collagen fibril diameter measured in transverse section (300 fibrils for each condition from  
13 each of 2 IPF donors, measured by a blinded investigator). (F) Atomic force microscopy  
14 indentation modulus of collagen fibrils (3–7 fibrils per donor) from control (n = 42 fibrils from  
15 eight donors) or IPF lung tissue (n = 57 fibrils from 10 donors) under non-hydrated conditions;  
16 each data point represents the mean of 30 to 50 force-displacement curves per fibril.

17  
18

19  
20

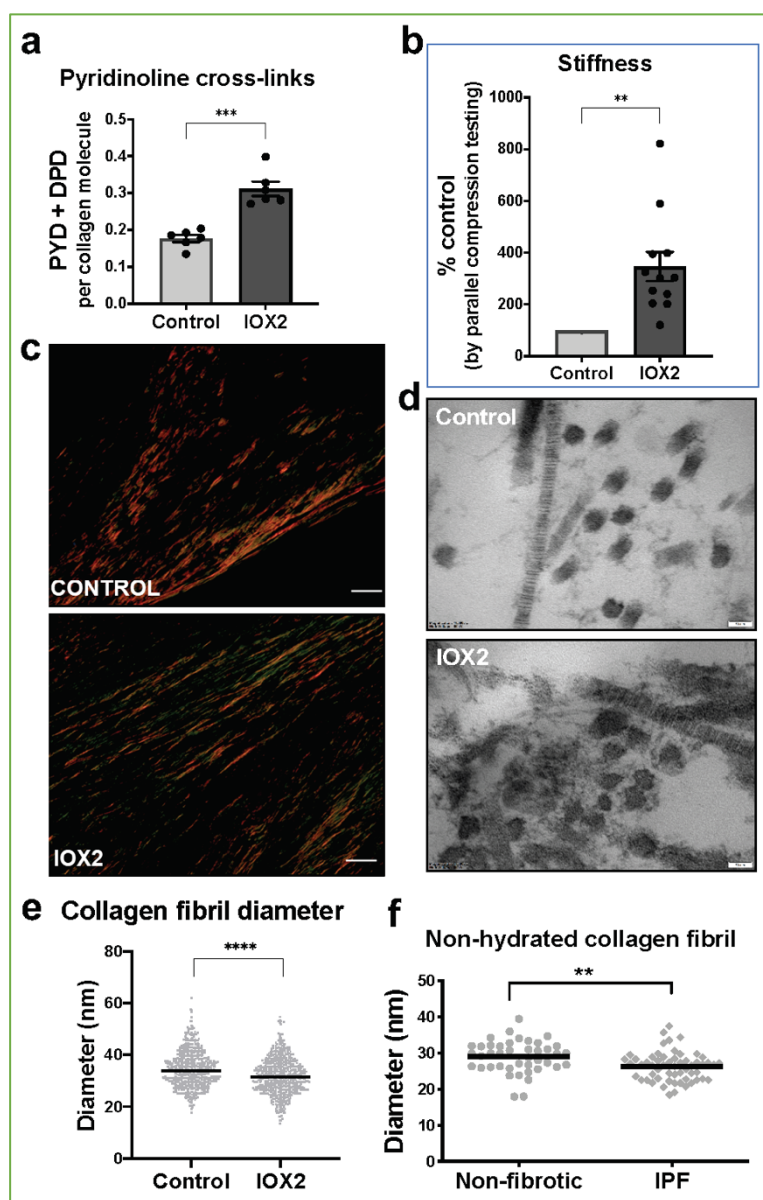

1 *Pseudohypoxia and loss of FIH activity promotes HIF pathway activation in lung fibroblasts*

2 Whilst canonical HIF pathway activation was observed in lung fibroblasts under hypoxic  
3 conditions, elevated levels of HIF1 $\alpha$  and HIF2 $\alpha$  in IPF fibroblasts under normoxic conditions  
4 have recently been reported<sup>12</sup>, suggesting a pseudohypoxic state i.e. a state in which cells  
5 express hypoxia-associated genes and proteins, regardless of the oxygen status<sup>13</sup>. To further  
6 investigate this possibility, we employed gene set variation analysis (GSVA) using a validated  
7 15-gene HIF/hypoxia gene expression signature<sup>14</sup> to published datasets, identifying that  
8 cultured fibroblasts from patients with a usual interstitial pneumonia pattern of fibrosis or  
9 systemic sclerosis associated lung fibrosis have a significantly increased HIF score compared  
10 to cultured control fibroblasts (Fig. 6a), consistent with an oxygen independent increase in  
11 HIF activity. Furthermore, there was a significant increase in the HIF score in lung  
12 mesenchymal stromal cells of patients with progressive lung fibrosis compared to those with  
13 stable fibrosis (Fig. 6b), suggesting that HIF pathway activation may be required for fibrosis  
14 progression.

15 To examine the mechanism underlying pseudohypoxic HIF activity in lung fibrosis, we  
16 investigated the role of Factor Inhibiting HIF (FIH), a Fe (II)- and 2-oxoglutarate (2-OG)-  
17 dependent dioxygenase, which regulates HIF activity via hydroxylating a conserved  
18 asparagine (Asn) residue within the HIF $\alpha$  C-terminal activation domain (CAD), a post-  
19 translational modification that blocks interactions between the HIF $\alpha$ -CAD and CBP/p300<sup>15-19</sup>.  
20 Whilst oxygen tension is the classical regulator of FIH activity, oxidative stress can inactivate  
21 FIH so promoting HIF activity under normoxic conditions<sup>20</sup>.

22 Initially, to investigate the potential role of reduced FIH activity in regulating collagen post-  
23 translational modifications, we silenced FIH under normoxic conditions, identifying that loss  
24 of FIH was sufficient to induce both PLOD2 and LOXL2 expression, and that this effect required

1 **Figure 6. Pseudohypoxia and loss of FIH activity promotes HIF pathway signalling in IPF**  
 2 **fibroblasts**

3 (A) HIF GSVA scores calculated in human lung fibroblasts derived from control or patients with  
 4 interstitial lung disease (scleroderma lung or a usual interstitial pneumonia / IPF pattern)  
 5 (GSE40839). Data are mean  $\pm$  s.d. \*\*\* $p$ <0.001; \*\*\*\* $p$ <0.0001 by Dunnett's multiple  
 6 comparisons test. (B) HIF GSVA scores calculated in human bronchoalveolar lavage derived  
 7 mesenchymal stromal cells from patients with stable and progressive IPF (GSE73854). Data  
 8 are mean  $\pm$  s.d. \* $p$ <0.05 by unpaired t test. (C) Protein expression of PLOD2, LOXL2 , HIF1 $\beta$ ,  
 9 FIH and  $\beta$ -tubulin in lung fibroblasts from patients with IPF transfected with indicated siRNA.  
 10  $\beta$ -tubulin was used as a loading control. The full blots are shown in Figure 6-source data 1. (D)  
 11 FIH reporter assays in NHLFs or IPFFs. Values represent relative fold of firefly luciferase in  
 12 relation to Renilla luciferase, normalised against control (1.0). Data are mean  $\pm$  s.d. n = 3  
 13 samples per group. \*\* $p$ < 0.01 by unpaired t test. (E) FIH reporter assays in NHLFs with  
 14 indicated treatment (hydrogen peroxide, DMOG, or vehicle control). Values represent relative  
 15 fold of firefly luciferase in relation to *Renilla* luciferase, normalised against control (1.0). Data  
 16 are mean  $\pm$  s.d. n = 3 samples per group. \*\*\* $p$ <0.001; \*\*\*\* $p$ <0.0001by Dunnett's multiple  
 17 comparisons test.

18

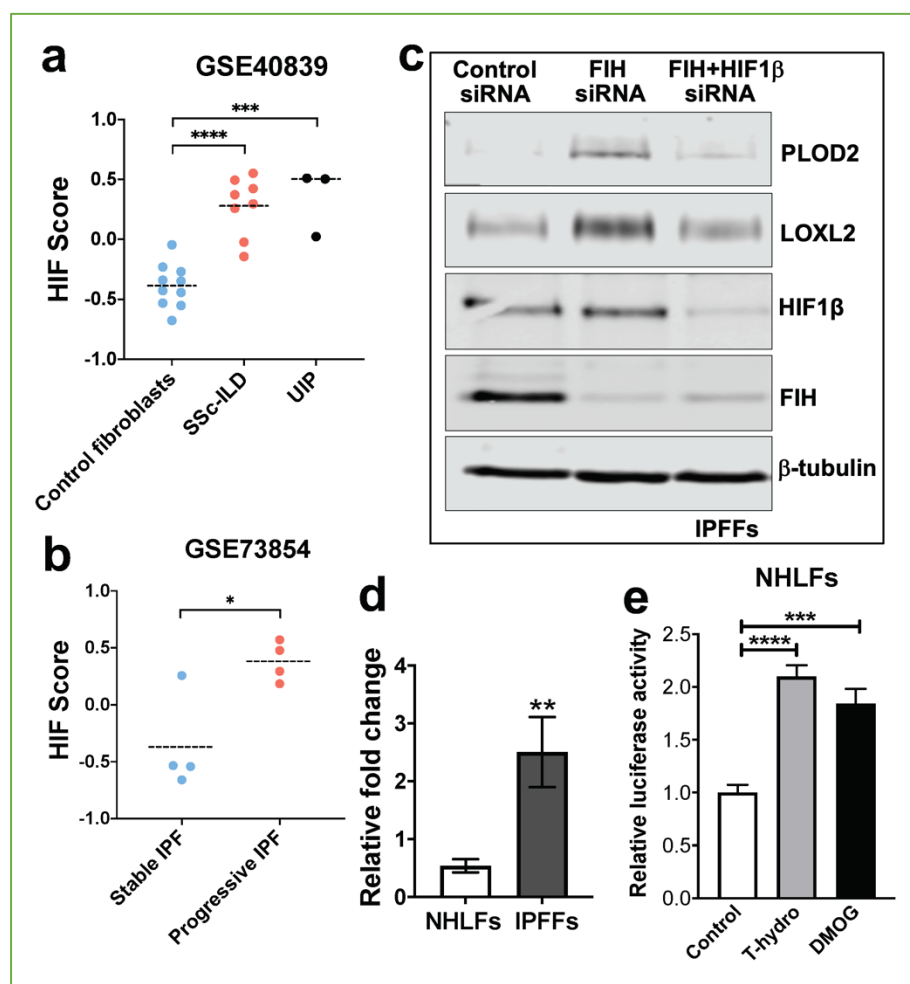



1 HIF activity, since HIF1 $\beta$  knockdown prevented their induction (Fig. 6c). Whilst FIH is stably  
2 constitutively expressed across tissues<sup>21, 22</sup>, the activity levels of FIH can vary<sup>23-25</sup>; thus we  
3 compared FIH activity in control or IPF fibroblasts using a UAS-luc/GAL4DBD-HIF1 $\alpha$ CAD binary  
4 reporter system<sup>26</sup>. In this assay, the activity of FIH is monitored by a Gal4-driven luciferase  
5 reporter that registers the activity of the heterologous Gal4-HIF-CAD fusion protein. Inhibition  
6 of FIH leads to a reduction in hydroxylation at Asn-803 of the HIF-CAD fusion, which permits  
7 increased recruitment of the transcriptional co-activators p300/CBP and enhanced reporter  
8 gene activity (Supplementary Figure 5). Consistent with a loss of function of FIH in lung fibrosis,  
9 we found FIH activity was significantly reduced in fibroblasts from patients with IPF compared  
10 to control fibroblasts (Fig. 6d). We further confirmed that a reduction in FIH activity in normal  
11 lung fibroblasts could be caused under normoxia by oxidative stress, achieving a level of HIF  
12 activation comparable to treatment with the hypoxia mimetic DMOG (Fig. 6e). Thus, in lung  
13 fibroblasts a reduction in FIH activity may promote HIF pathway activation to dysregulate  
14 collagen structure-function.

15

16 *HIF pathway activation localises in areas of active fibrogenesis to cells co-expressing LOXL2*  
17 *and PLOD2*

18 To support our in vitro studies, we investigated for evidence that HIF regulates *PLOD2* and  
19 *LOXL2* expression within the fibroblast foci of human IPF lung tissue. To assess for HIF activity  
20 we applied GSVA using the 15-gene HIF/hypoxia gene expression signature<sup>14</sup> to the  
21 transcriptome of each fibroblast focus, identifying that the HIF signature score, but not TGF $\beta$   
22 score, significantly correlated with *LOXL2/PLOD2* expression (Fig. 7a and b). Furthermore,  
23 analysis of serial tissue sections using immunohistochemistry identified that HIF1 $\alpha$  and the  
24 HIF pathway activation marker gene carbonic anhydrase IX (CA-IX) were expressed within

1 **Figure 7. HIF pathway activation localises in areas of active fibrogenesis to cells co-**  
2 **expressing LOXL2 and PLOD2**

3 (A-B) Scatterplots showing correlations between *LOXL2*/*PLOD2* expressions and HIF scores (A)  
4 or TGF $\beta$  scores (B) in IPF fibroblast foci (n= 10) using Spearman correlation coefficient. (C)  
5 Representative images of serial sections of lung tissue from patients with IPF (n=3). mRNA  
6 expression of *PLOD2* (red chromagen) and *LOXL2* (green chromagen) using RNAscope<sup>®</sup> RNA  
7 in-situ hybridisation with immunohistochemical staining for Carbonic anhydrase IX (CA-IX)  
8 and HIF1 $\alpha$  using DAB (brown). A fibroblastic focus is identified by \*. Scale bar 20  $\mu$ m.

9

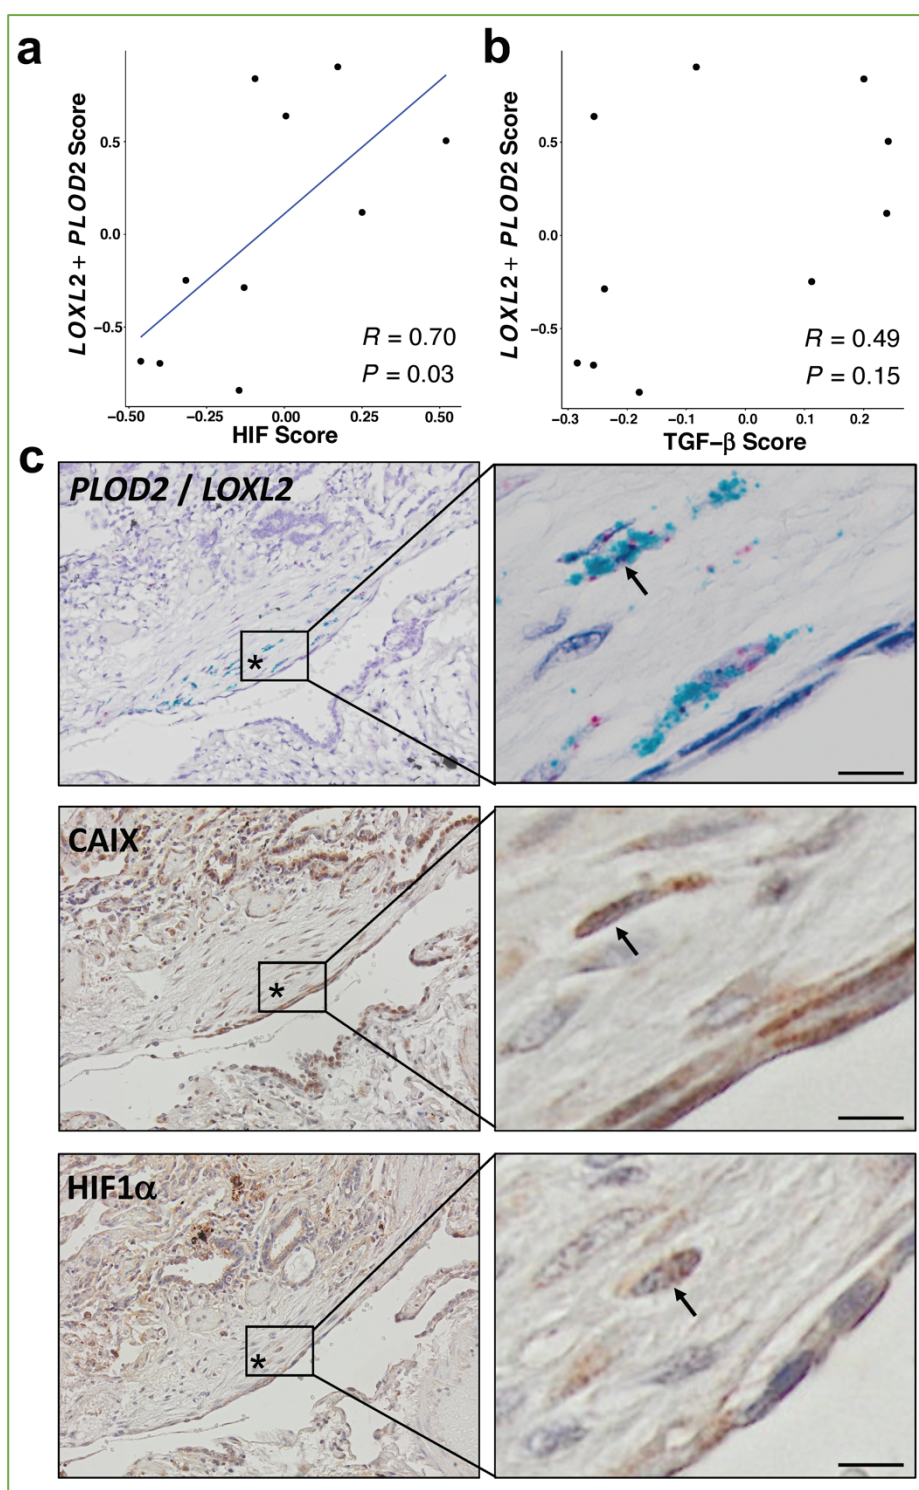

1 fibroblast foci<sup>7, 27</sup>, and that this expression localised to cells co-expressing *LOXL2* and *PLOD2*  
2 mRNA (Fig. 7c). Finally, as FIH is more sensitive to inhibition by oxidative stress<sup>20</sup> whilst PHDs  
3 are more sensitive to hypoxia we investigated whether HIF activation occurs in lung  
4 mesenchymal cells in the context of oxidative stress. We applied GSVA to a published single  
5 cell RNAseq dataset (114,396 cells) from 10 control and 20 fibrotic lungs which identified 31  
6 cell types including 4 fibroblast types (fibroblasts, myofibroblasts, Hyaluronan Synthase 1  
7 (HAS1) high and Perilipin 2 (PLIN2)+ fibroblasts) (Supplementary Fig. 6)<sup>28</sup>. Applying HIF  
8 signature or upregulated oxidative stress gene expression signatures to this dataset, we  
9 identified that, compared to fibroblasts and myofibroblasts, the HAS1 high and PLIN2+ cells,  
10 whose presence was almost exclusively derived from the IPF lung tissue, had significantly  
11 increased HIF and upregulated oxidative stress scores (Fig. 8a-d) and that these significantly  
12 correlated (Fig. 8e), consistent with an increase in pseudohypoxic HIF activity in these disease-  
13 specific mesenchymal cell types.

1 **Figure 8: Gene set variance analysis of single-cell RNAseq fibroblast populations identifies**  
 2 **co-enrichment of HIF score and oxidative stress genes.**  
 3 A: HIF score GSVA in control and IPF fibroblasts sequenced by single-cell RNAseq (GSE135893).  
 4 Colours correspond to calculated GSVA score for each cell. B: Plot of mean HIF GSVA scores  
 5 for each fibroblast type in control and IPF fibroblast cell populations and compared using  
 6 Dunnett's multiple comparison test, \*\*\*\*P < 0.0001. C: GSVA scores for genes upregulated in  
 7 IPF in this dataset associated with the Gene Set:  
 8 HALLMARK\_REACTIVE\_OXYGEN\_SPECIES\_PATHWAY (M5938). D: Plot of upregulated  
 9 oxidative stress GSVA scores for each fibroblast type in control and IPF cells. E: Correlation  
 10 plot of HIF score vs upregulated oxidative stress GSVA score for single cell RNAseq data.  
 11 Correlation coefficient is Pearson's product-moment coefficient.  
 12

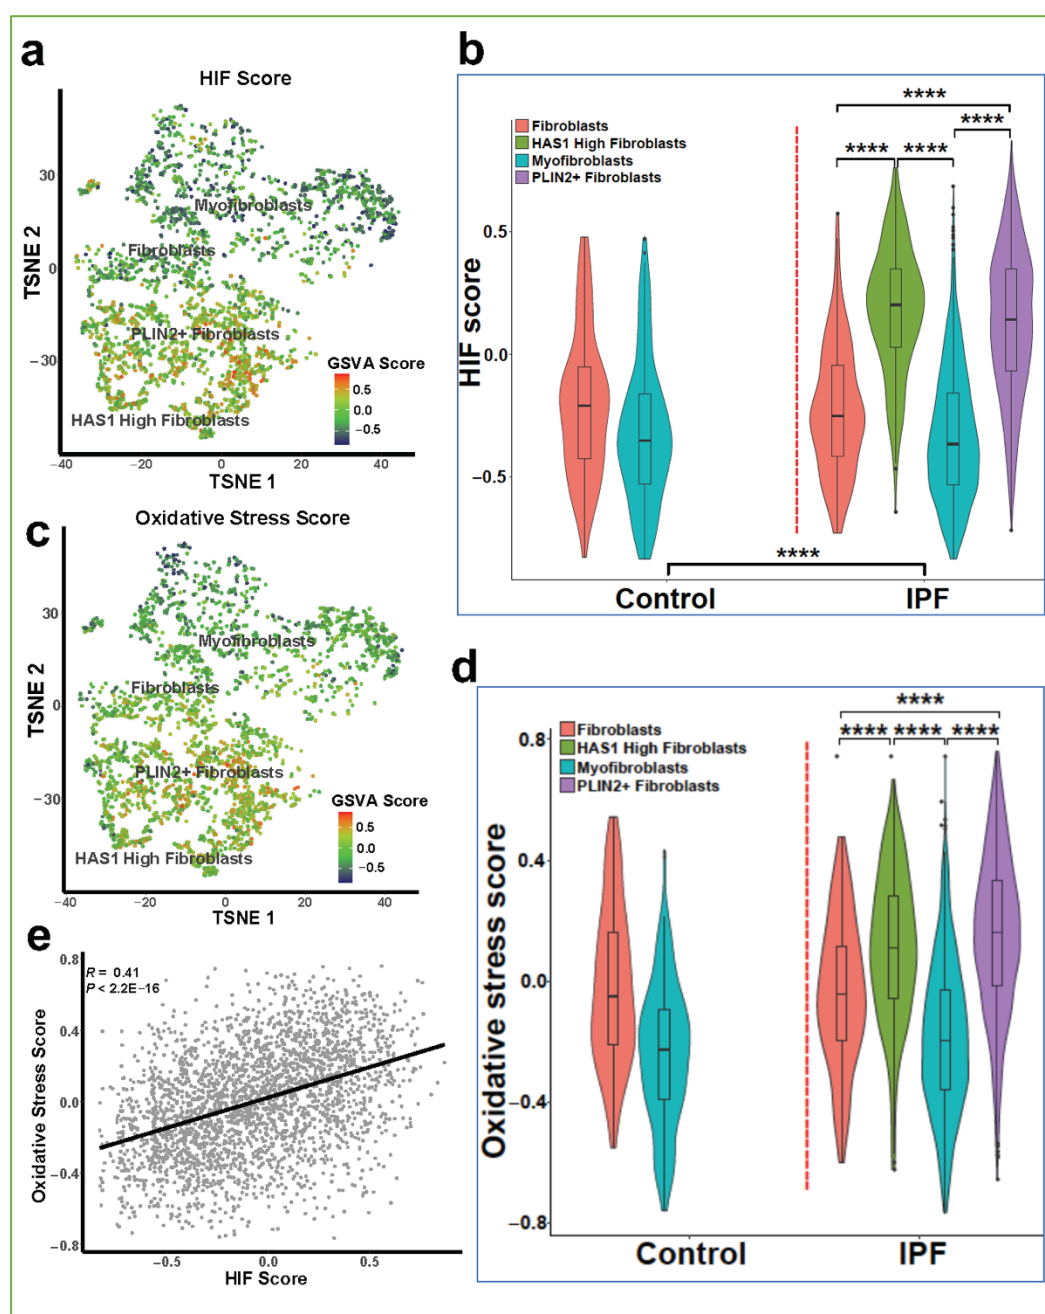

## 1 Discussion

2 We previously reported that altered collagen fibril nanoarchitecture is a core determinant of  
3 dysregulated ECM structure-function in human lung fibrosis<sup>1</sup>. Here, through ex vivo models,  
4 bioinformatics and human lung fibrosis tissue studies, we extend these observations to  
5 identify that HIF pathway activation promotes pathologic collagen crosslinking and tissue  
6 stiffness by disproportionate induction of ‘bone-type’ collagen-modifying enzymes relative to  
7 TGF $\beta$ -induced collagen fibril synthesis. Furthermore, this may occur via pseudohypoxic  
8 oxygen-independent mechanisms involving loss of FIH activity that can occur due to oxidative  
9 stress, which is thought to play a significant role in IPF pathogenesis<sup>29</sup>. Consistent with this,  
10 oxidative stress is increased in subpopulations of IPF fibroblasts whilst FIH activity is  
11 significantly reduced in fibroblasts from patients with lung fibrosis resulting in HIF activation  
12 under normoxic conditions. Thus, we provide evidence that dysregulated HIF activity is a core  
13 regulator of ECM structure-function in human lung fibrosis, and that this may be a key  
14 determinant of pathologic tissue stiffness and progressive human lung fibrosis.

15 TGF $\beta$  is a multifunctional growth factor with key roles in normal development and wound  
16 healing. It is also considered the prototypic profibrogenic cytokine that promotes increased  
17 ECM deposition and has been associated with fibrosis across multiple organs<sup>6</sup>. We identified  
18 that in lung fibroblasts, TGF $\beta$ 1 increased fibrillar collagen mRNA transcription but  
19 proportionally its effects on *PLOD2* or *LOXL2* were more limited, suggesting that TGF $\beta$   
20 pathway activation alone may be insufficient to cause a substantial increase in bone-type  
21 pathologic collagen crosslinking. Rather, HIF pathway activation was required to  
22 disproportionately induce *PLOD2/LOXL2* relative to interstitial collagen fibril synthesis, so  
23 promoting ‘bone’ type collagen fibrillogenesis, altering collagen fibril nanostructure, and  
24 increasing tissue stiffness. While TGF $\beta$  has been reported to cause HIF stabilization<sup>30</sup>, our

1 findings suggest that this effect is modest and that further HIF activation is required to drive  
2 matrix stiffening. This would be in keeping with a recent observation of an hierarchical  
3 relationship in which HIF proteins play a more powerful role in the induction of PLOD2  
4 expression, with HIF transcription factors dominating the effect of TGF $\beta$  stimulated SMAD  
5 proteins<sup>31</sup>. Thus, we propose that HIF pathway activation acts as a key pathologic ‘second hit’  
6 which disrupts the normal wound healing role of TGF $\beta$  by altering collagen fibril  
7 nanoarchitecture so dysregulating ECM structure-function and promoting progressive lung  
8 fibrosis. In keeping with this concept, GSVA using a validated HIF score<sup>14</sup> applied to microarray  
9 data for lung mesenchymal stromal cells showed that HIF activity was increased in cells from  
10 patients with progressive lung fibrosis compared with those with stable disease.

11 We investigated the functional consequences of our findings by employing our long-term  
12 3D *in vitro* model of lung fibrosis, identifying that HIF pathway activation increased  
13 pyridinoline cross-links to a level comparable to that identified in IPF tissue, and that this was  
14 associated with an increase in tissue stiffness comparable to the extremes of stiffness  
15 identified in IPF tissue together with a reduction in fibril diameter similar to those present in  
16 IPF lung tissue. Together these observations support the human disease relevance of HIF  
17 pathway activation to IPF and define conditions for future mechanistic studies whereby the  
18 3D *in vitro* model recapitulates key features of dysregulated collagen structure-function in IPF.

19 Hypoxia has been proposed to have a pathogenetic role in lung fibrosis through  
20 mechanisms including fibroblast proliferation, augmented ER stress, epithelial-mesenchymal  
21 transition, and glycolytic reprogramming<sup>7, 32-34</sup>. Furthermore, a number of reports have  
22 proposed that cross-talk between TGF $\beta$  and hypoxia may promote fibrosis, with hypoxia and  
23 TGF $\beta$ 1 synergistically increasing myofibroblast marker expression<sup>35</sup>, promoting experimental

1 nickel oxide nanoparticle-induced lung fibrosis<sup>36</sup>, and HIF1 $\alpha$  mediating TGF- $\beta$ -induced PAI-1  
2 production in alveolar macrophages in the bleomycin model of lung fibrosis<sup>37</sup>.

3 The HIF signalling pathway has been reported to be active in lungs and fibroblasts from IPF  
4 patients, as determined by the abundance of HIF alpha subunits 1 and 2<sup>7</sup>. These findings are  
5 consistent with our own observations of increased expression of the HIF-responsive gene, CA-  
6 IX. Here we extended these observations by showing that in lung fibrosis, loss of FIH activity  
7 either by siRNA-mediated knockdown or exposure to oxidative stress induces HIF pathway  
8 activation independently of oxygen tension, so dysregulating collagen fibrillogenesis under  
9 normoxic conditions. FIH negatively regulates HIF activity by hydroxylation of N803,  
10 preventing the interaction of the HIF $\alpha$  CAD with CBP/p300<sup>15-19</sup>. Whilst oxygen tension is the  
11 classical regulator of FIH activity, oxidative stress can inactivate FIH so promoting HIF activity<sup>20</sup>.  
12 Oxidative stress has been implicated as an important profibrotic mechanism in the lungs and  
13 other organs<sup>29, 38, 39</sup>. It can arise from exposure to environmental toxins (e.g. air pollution,  
14 tobacco, asbestos, silica, radiation, and drugs such as bleomycin) or from endogenous sources  
15 including mitochondria, NADPH oxidase (NOX) activity, and/or inadequate or deficient  
16 antioxidant defenses<sup>29</sup>. In our own bioinformatic studies, we observed subsets of disease-  
17 specific fibroblasts with elevated scores for oxidative stress and these same populations had  
18 evidence of HIF pathway activation.

19 To our knowledge whether perturbations in FIH activity could contribute to fibrosis has not  
20 been investigated previously. Whilst our studies have focussed upon HIF pathways and  
21 collagen, functionally FIH, via both HIF-dependent and HIF-independent pathways, has been  
22 reported to regulate metabolism<sup>40-43</sup>, keratinocyte differentiation<sup>44</sup>, vascular endothelial cell  
23 survival<sup>45</sup>, tumour growth<sup>46, 47</sup> and metastasis<sup>48</sup> as well as Wnt signalling<sup>49</sup>, suggesting that the

1 loss of FIH activity we have identified could have pleiotropic effects in lung fibrosis which  
2 merits further investigation.

3 In summary, this study identifies that HIF pathway activation via oxygen dependent and  
4 oxygen independent mechanisms promotes 'bone type' collagen nano-architecture which is  
5 a defining feature of human lung fibrosis that dysregulates ECM structure-function to  
6 promote progressive lung fibrosis. Our findings suggest that therapeutically targeting HIF  
7 pathway activation might restore ECM homeostasis and so prevent fibrosis progression.



## 1 MATERIALS AND METHODS

### 2 *Lung Tissue Sampling*

3 Human lung experiments were approved by the Southampton and South West Hampshire  
4 and the Mid and South Buckinghamshire Local Research Ethics Committees (ref 07/H0607/73),  
5 and all subjects gave written informed consent. Clinically indicated IPF lung biopsy tissue  
6 samples deemed surplus to clinical diagnostic requirements were formalin fixed and paraffin  
7 embedded. All IPF samples were from patients subsequently receiving a multidisciplinary  
8 diagnosis of IPF according to international consensus guidelines.

9

### 10 *Transcriptomic analysis of in situ IPF fibroblast foci*

11 We analysed a transcriptomic data set that we have recently established (GSE169500). Briefly,  
12 laser capture microdissection was performed upon Formalin-Fixed Paraffin-Embedded (FFPE)  
13 control non-fibrotic lung tissue (alveolar septae, (n=10)) and usual interstitial  
14 pneumonia/idiopathic pulmonary fibrosis FFPE lung tissue (fibroblast foci, (n=10) and  
15 adjacent non-affected alveolar septae, (n=10)). Total RNA was isolated, cDNA libraries were  
16 prepared using Ion Ampli-Seq-transcriptome human gene expression kit (Life Technologies,  
17 Paisley, UK) and sequenced using Ion Torrent Proton Sequencer. A two-stage mapping  
18 strategy was used to map the reads to UCSC hg19 human genome. Cufflinks was used to  
19 calculate Fragments per Kilobase of exon per Million (FPKM) values.

20

### 21 *RNA in-situ hybridisation*

22 Simultaneous in situ detection of the LOXL2 and PLOD2 mRNA on human IPF formalin fixed  
23 paraffin embedded tissue sections were performed using duplex RNAscope© technology  
24 (Advanced Cell Diagnostics, Biotechne, Abingdon, UK). *LOXL2* was detected by C1-probe

1 (Probe-Hs-LOXL2-C1, 311341) and *PLOD2* was detected by C2-probe (Probe-Hs-*PLOD2*-C2,  
2 547761-C2). Briefly, 5- $\mu$ m human IPF lung tissue sections were baked at 60C, deparaffinized  
3 in xylene, followed by dehydration in an ethanol series. Target retrieval, hybridization with  
4 target probes, amplification, and chromogenic detection were performed according to the  
5 manufacturer's recommendations (RNAscope 2.5 Duplex Detection protocol for FFPE tissues).  
6 Sections were counterstained with Gill's Hematoxylin, and mounted with Vectamount  
7 permanent mounting medium prior to imaging. Assays were performed with duplex positive  
8 (*PPIB* and *POLR2A*) and negative controls. Images were acquired using an Olympus Dotslide  
9 Scanner VS110 (Olympus UK, Southend-on-Sea, UK).

10

### 11 ***2D Cell culture, reagents and transfections***

12 Primary fibroblast cultures were established from lung parenchyma tissue of patients with IPF  
13 obtained by video-assisted thoracoscopic lung biopsy at University Hospital Southampton or  
14 non-fibrotic control lung parenchyma tissue (macroscopically normal lung sampled remote  
15 from a cancer site in patients undergoing surgery for early stage lung cancer)<sup>1, 3, 50, 51</sup>. MRC5  
16 lung fibroblasts were obtained from the European Collection of Authenticated Cell Cultures  
17 (ECACC). All cultures were tested and free of mycoplasma contamination. Fibroblasts were  
18 cultured in Dulbecco's Modified Eagle's Medium (DMEM) supplemented with 10% foetal  
19 bovine serum (FBS), 50 units/ml penicillin, 50 $\mu$ g/ml streptomycin, 2mM L-glutamine, 1mM  
20 sodium pyruvate and 1x non-essential amino acids (DMEM/FBS) (Life Technologies, Paisley,  
21 UK). All cells were kept at 37 °C and 5% CO<sub>2</sub>. Hypoxic incubation of cells was carried out in a  
22 H35 Hypoxystation (Don Whitley Scientific) in which cells were cultured in humidified  
23 atmosphere of 1% O<sub>2</sub>, 5% CO<sub>2</sub>, and 94% N<sub>2</sub> at 37 °C. Following hypoxic incubation, cells were  
24 kept in hypoxic condition until samples were collected.

1 For pro-fibrogenic mediator studies control lung fibroblasts were treated in the presence  
2 of EGF (R&D systems, 236-GMP-200, 10ng/mL), TGF $\beta$ 1 (R&D systems, 240-GMP-010,  
3 10ng/mL), Dimethyloxaloylglycine (DMOG) (Merck, CAS89464-63-1, 1mM), Wnt3a (R&D  
4 systems, 5036-WN-010, 100ng/mL), Wnt5a (R&D systems, 645-WN-010, 100ng/mL), or  
5 vehicle control (DMSO). For subsequent HIF studies fibroblasts were treated in the presence  
6 of DMOG (1mM), IOX2 (50  $\mu$ M or 250  $\mu$ M) or vehicle control (DMSO)

7 Short interfering RNA (siRNA) oligos against HIF1A (HIF1 $\alpha$ ) (MU-00401805-01-0002), EPAS1  
8 (HIF2 $\alpha$ ) (MU-004814-01-0002), ARNT (HIF1 $\beta$ ) (MU-007207-01-0002) and HIF1AN (FIH) (MU-  
9 004073-02-0002), LOXL2(L-008020-01-0005) were purchased from Dharmacon, Cambridge,  
10 UK. Sequences are available from Dharmacon, or on request. As a negative control, we used  
11 siGENOME RISC-Free siRNA (Dharmacon, D-001220-01). Human lung fibroblasts were  
12 transfected with the indicated siRNA at a final concentration of 35 nM using Lipofectamine  
13 RNAiMAX reagent (Invitrogen).

14

### 15 **Reporter assay**

16 FIH activity was evaluated using a UAS-luc/GAL4DBD-HIF1 $\alpha$ CAD binary reporter system<sup>26</sup>. For  
17 the luciferase reporter assays in a 24 well plate, human lung fibroblasts (NHLFS or IPFFs) were  
18 reverse transfected using Lipofectamine 3000 (Invitrogen) with 50 ng of phRL-CMV (Promega  
19 UK, Southampton, UK), which constitutively expresses the *Renilla* luciferase reporter, plus  
20 225 ng of plasmid-GAL4DBD-HIF1 $\alpha$ CAD. and 225 ng of plasmid-UAS-luc per well. After 24-  
21 hour of transfections, a final concentration of 1mM of DMOG, 1mM DMSO or 20 $\mu$ M freshly  
22 prepared T-hydro (tert-butyl hydroperoxide) (Sigma-Aldrich, Poole, UK) was dosed for 16  
23 hours. T-hydro was added to the cells every 2 hours. Finally, the transcriptional assay was

1 carried out using the Dual-Luciferase reporter assay system (Promega) following the  
2 manufacturer's protocol.

3

4

### 5 ***HIF score, TGF $\beta$ score and Oxidative Stress GSVA Analyses***

6 Raw CEL files for GSE73854 and GSE40839 were downloaded from GEO and imported into  
7 RStudio (version 3.6). Raw data were normalised by Robust Multi-array Average (RMA)  
8 function in the affy package (version 1.64.0). Multiple probes relating to the same gene were  
9 deleted and summarised as the median value for further analysis.

10 A 15-gene expression signature (*ACOT7, ADM, ALDOA, CDKN3, ENO1, LDHA, MIF, MRPS17,*  
11 *NDRG1, P4HA1, PGAM1, SLC2A1, TPI1, TUBB6* and *VEGFA*) was selected to classify HIF  
12 activity<sup>14</sup>. All parameters and variables can be found in the accompanying file (Source code 1).  
13 This gene signature was defined based on knowledge of gene function and analysis of in vivo  
14 co-expression patterns and was highly enriched for HIF-regulated pathways. The HIF score for  
15 each sample was calculated by using gene set variation analysis (GSVA)<sup>52</sup> based on this 15-  
16 gene expression signature. The TGF $\beta$  score for each sample was calculated by using GSVA  
17 based on a list of gene from Gene Set: HALLMARK\_TGF\_BETA\_SIGNALING (M5896). All  
18 parameters and variables can be found in the accompanying file (Source code 2). The Student  
19 t-test was used to evaluate the statistical difference in HIF scores between different  
20 conditions.

21 For single cell transcriptomic analyses raw CEL files for GSE135893 were downloaded from  
22 GEO. Data was processed using the Seurat R package (v3.2.1) in R version 4.0.2. Cell types  
23 were assigned based on the published metadata<sup>28</sup>. Fibroblast counts data were log-  
24 normalised, variable genes quantified and principal component analysis performed on these

1 variable genes. T-stochastic nearest neighbour embedding (t-SNE) dimensional reduction was  
2 performed on the top 15 principal components to obtain embeddings for individual cells.  
3 GSVA was performed using the 15 genes used for HIF score calculation as above. An oxidative  
4 stress score for each cell was calculated using GSVA based on a list of genes upregulated in  
5 IPF cell populations (*ABCC1*, *CDKN2D*, *FES*, *GCLC*, *GCLM*, *GLRX2*, *HHEX*, *IPCEF1*, *JUNB*,  
6 *LAMTOR5*, *LSP1*, *MBP*, *MGST1*, *MPO*, *NDUFA6*, *PFKP*, *PRDX1*, *PRDX2*, *PRDX4*, *PRNP*, *SBNO2*,  
7 *SCAF4*, *SOD1*, *SOD2*, *RXN1*, *TXN*, *TXNRD1*) from Gene Set:  
8 HALLMARK\_REACTIVE\_OXYGEN\_SPECIES\_PATHWAY (M5938). All parameters and variables  
9 can be found in the accompanying file (Source code 3). Upregulated oxidative stress genes  
10 were those whose expression was higher in IPF populations than control. Calculated GSVA  
11 scores were mapped onto t-SNE plots. Student's t-test was used to calculate statistical  
12 differences between GSVA scores of the different cellular populations.

13

### 14 ***3D in vitro model of fibrosis***

15 Culture was performed as previously described<sup>1</sup>. Briefly, peripheral lung fibroblasts were  
16 obtained as outgrowths from surgical lung biopsy tissue of patients (n = 3 donors) who were  
17 subsequently confirmed with a diagnosis of IPF. All primary cultures were tested and free of  
18 mycoplasma contamination. The fibroblasts were seeded in Transwell inserts in DMEM  
19 containing 10% FBS. After 24 hr, the media was replaced with DMEM/F12 containing 5% FBS,  
20 10 µg/ml L-ascorbic acid-2-phosphate, 10 ng/ml EGF, and 0.5 µg/ml hydrocortisone with or  
21 without 50 µM or 250 µM IOX2, as indicated; each experiment included a vehicle control (0.2%  
22 DMSO). TGF-β1 (3 ng/mL) was added to the cultures, and the medium replenished three times  
23 per week. After 2 weeks spheroids were lysed for western blotting. After 6 weeks the  
24 spheroids were either snap frozen for parallel-plate compression testing, analysis of cross-

1 linking, and histochemical staining, or fixed using 4% paraformaldehyde for histochemistry or  
2 3% glutaraldehyde in 0.1 M cacodylate buffer at pH 7.4 for electron microscopy.

3

#### 4 ***Reverse transcription quantitative polymerase chain reaction (RTqPCR)***

5 RTqPCR was performed as previously described<sup>3, 50, 51</sup>. Primers and TaqMan probe sets were  
6 obtained from Primer Design, Southampton, UK (*LOXL2*, *COL1A1*, *Col3A1*, *PLOD2*),  
7 ThermoFisher Scientific, Reading, UK (*HIF1A*, *EPAS1*, *HIF1 $\beta$* ), and Qiagen, Manchester, UK  
8 (QuantiTect Primer Assays, *HIF1A*, *EPAS1*, *ARNT*, *LOXL2*, *PLOD2*, *CA9*, *ACTB*).

9

#### 10 ***Western blotting***

11 Fibroblasts were lysed using 2x Laemmli SDS sample buffer or urea buffer (8 M Urea, 1 M  
12 Thiourea, 0.5% CHAPS, 50 mM DTT, and 24 mM Spermine). Western blotting of cellular lysates  
13 was performed for  $\beta$ -actin (1:100,000, Sigma-Aldrich, Poole, UK), LOXL2 (1:1000, R&D  
14 Systems, Abingdon, UK), HIF1 $\alpha$  (1:1000, BD Biosciences, Wokingham, UK), FIH (1:200, mouse  
15 monoclonal 162C)<sup>53</sup>,  $\beta$ -tubulin (1:1000, Cell Signaling Technology, London, UK), HIF1  $\beta$  (1:1000,  
16 Cell Signaling Technology), p-Smad2/3 (1:1000, Cell Signaling Technology), p-ERK (1:1000, Cell  
17 Signaling Technology), active  $\beta$ -catenin (1:1000, Cell Signaling Technology). Immunodetected  
18 proteins were identified using the enhanced chemiluminescence system (Clarity Western  
19 Blotting ECL Substrate, Bio-Rad Laboratories Ltd, Watford, UK) or Odyssey imaging system (LI-  
20 COR), and evaluated by ImageJ 1.42q software (National Institutes of Health).

21

#### 22 ***Immunofluorescence staining***

23 Cells were fixed with 4% paraformaldehyde followed by permeabilization and staining with  
24 primary antibodies for LOXL2 (1:500, R&D Systems) and Tetramethylrhodamine (TRITC)-

1 conjugated Phalloidin (1:1000, Millipore UK Limited, Watford, UK). The secondary antibodies  
2 used were Alexafluor 488 and 647 (1:1000, BioLegend UK Ltd, London, UK). Cell nuclei were  
3 counterstained with 4',6-Diamidino-2-Phenylindole, Dihydrochloride (DAPI) (1:1000,  
4 Millipore UK Limited, Watford, UK). Cells were imaged using an inverted confocal microscope  
5 (Leica TCS-SP5 Confocal Microscope, Leica Microsystems).

6

### 7 ***Immunohistochemistry***

8 Control or IPF lung tissues (n = 3 donors) were fixed and embedded in paraffin wax; tissue  
9 sections (4µm) were processed and stained as previously described<sup>3, 51</sup>. Briefly, the tissue  
10 sections were de-waxed, rehydrated and incubated with 3% hydrogen peroxide in methanol  
11 for 10 min to block endogenous peroxidase activity. Sections were then blocked with normal  
12 goat serum and incubated at room temperature with a primary antibody against CA-IX (1:500,  
13 Novus Biologicals, Cambridge, UK) or HIF1α ( 1:500, Cayman Chemical, Michigan, USA),  
14 followed by a biotinylated secondary antibody (1:500, Vector Laboratories Ltd., UK); antibody  
15 binding was detected using streptavidin-conjugated horse-radish peroxidase and visualised  
16 using DAB before counter- staining with Gill's Haematoxylin. Images were acquired using an  
17 Olympus Dotslide Scanner VS110.

18

19 ***Protein, hydroxyproline and collagen cross-link assays: performed as previously described<sup>1</sup>.***

20

21 ***Parallel plate compression testing: performed as previously described<sup>1</sup>.***

22

23 ***Transmission electron microscopy: performed as previously described<sup>1</sup>.***

24

1 ***Atomic force microscopy nanoindentation imaging of individual non-hydrated collagen***

2 ***fibrils***: performed as previously described<sup>1</sup>.

3

#### 4 **Statistics**

5 Statistical analyses were performed in GraphPad Prism v7.02 (GraphPad Software Inc., San  
6 Diego, CA) unless otherwise indicated. No data were excluded from the studies and for all  
7 experiments, all attempts at replication were successful. For each experiment, sample size  
8 reflects the number of independent biological replicates and is provided in the figure legend.  
9 Normality of distribution was assessed using the D'Agostino-Pearson normality test.  
10 Statistical analyses of single comparisons of two groups utilised Student's t-test or Mann-  
11 Whitney U-test for parametric and non-parametric data respectively. Where appropriate,  
12 individual t-test results were corrected for multiple comparisons using the Holm-Sidak  
13 method. For multiple comparisons, one-way analysis of variance (ANOVA) with Dunnett's  
14 multiple comparison test or Kruskal-Wallis analysis with Dunn's multiple comparison test  
15 were used for parametric and non-parametric data, respectively. Results were considered  
16 significant if  $p < 0.05$ , where \* $p < 0.05$ , \*\* $p < 0.01$ , \*\*\* $p < 0.001$ , \*\*\*\* $p < 0.0001$ .



## 1 **Acknowledgements**

2 This project was supported by Medical Research Council (MR/S025480/1), the Wellcome  
3 Trust (100638/Z/12/Z), an Academy of Medical Sciences/the Wellcome Trust Springboard  
4 Award [SBF002\1038], and the AAIR Charity. CJB and LSND acknowledge the support of the  
5 NIHR Southampton Biomedical Research Centre. LY was supported by China Scholarship  
6 Council. YZ was supported by an Institute for Life Sciences PhD Studentship. FC was  
7 supported by Medical Research Foundation [MRF-091-0003-RG-CONFO]. ML was supported  
8 by a BBSRC Future Leader Fellowship [BB/PO11365/1] and a NIHR Southampton Biomedical  
9 Research Centre Senior Research Fellowship. We thank Carine Fixmer, Maria Lane,  
10 Benjamin Johnson, and the nurses of the Southampton Biomedical Research Unit for their  
11 help in the collection of human samples, supported by the Wessex Clinical Research  
12 Network and the National Institute of Health Research, UK. We also thank Dr. Tammie  
13 Bishop (University of Oxford) for her technical support in IHC and Prof Sir Peter Ratcliffe  
14 (University of Oxford) for the FIH antibody (mouse monoclonal 162C) and the UAS-  
15 luc/GAL4DBD-HIF1 $\alpha$ CAD binary reporter system.

16

## 17 **Competing interests**

18 D.E.D is co-founder of, share-holder in and consultant to Synairgen Research Ltd.  
19 N.K. served as a consultant to Biogen Idec, Boehringer Ingelheim, Third Rock, Pliant, Samumed,  
20 NuMedii, Theravance, LifeMax, Three Lake Partners, Optikira, Astra Zeneca, Veracyte,  
21 Augmanity and CSL Behring, over the last 3 years, reports Equity in Pliant and a grant from  
22 Veracyte, Boehringer Ingelheim, BMS and non-financial support from MiRagen and Astra  
23 Zeneca. NK has IP on novel biomarkers and therapeutics in IPF and ARDS licensed to Biotech.

1 L.R. reports personal fees and other from Boehringer Ingelheim, other from Fibrogen,  
2 personal fees from InterMune, personal fees from Cipla, personal fees from Vertex, other  
3 from GlaxoSmithKline, other from Astrazeneca, other from Sanofi-Aventis, other from  
4 Celgene, other from Prometic, other from Roche, from Takeda, outside the submitted work.

5

6

7

8

## 1 References

- 2 1. Jones, M.G. *et al.* Nanoscale dysregulation of collagen structure-function disrupts  
3 mechano-homeostasis and mediates pulmonary fibrosis. *Elife* **7** (2018).
- 4 2. Richeldi, L., Collard, H.R. & Jones, M.G. Idiopathic pulmonary fibrosis. *Lancet* **389**,  
5 1941-1952 (2017).
- 6 3. Yao, L. *et al.* Paracrine signalling during ZEB1-mediated epithelial-mesenchymal  
7 transition augments local myofibroblast differentiation in lung fibrosis. *Cell Death*  
8 *Differ* **26**, 943-957 (2019).
- 9 4. Martin-Medina, A. *et al.* Increased Extracellular Vesicles Mediate WNT5A Signaling in  
10 Idiopathic Pulmonary Fibrosis. *Am J Respir Crit Care Med* **198**, 1527-1538 (2018).
- 11 5. Konigshoff, M. *et al.* Functional Wnt signaling is increased in idiopathic pulmonary  
12 fibrosis. *PLoS One* **3**, e2142 (2008).
- 13 6. Yue, X., Shan, B. & Lasky, J.A. TGF-beta: Titan of Lung Fibrogenesis. *Curr Enzym Inhib*  
14 **6** (2010).
- 15 7. Bodempudi, V. *et al.* miR-210 promotes IPF fibroblast proliferation in response to  
16 hypoxia. *Am J Physiol Lung Cell Mol Physiol* **307**, L283-294 (2014).
- 17 8. Chowdhury, R. *et al.* Selective small molecule probes for the hypoxia inducible factor  
18 (HIF) prolyl hydroxylases. *ACS Chem Biol* **8**, 1488-1496 (2013).
- 19 9. Schodel, J. & Ratcliffe, P.J. Mechanisms of hypoxia signalling: new implications for  
20 nephrology. *Nat Rev Nephrol* **15**, 641-659 (2019).
- 21 10. Schofield, C.J. & Ratcliffe, P.J. Oxygen sensing by HIF hydroxylases. *Nat Rev Mol Cell*  
22 *Biol* **5**, 343-354 (2004).
- 23 11. Booth, A.J. *et al.* Acellular normal and fibrotic human lung matrices as a culture  
24 system for in vitro investigation. *Am J Respir Crit Care Med* **186**, 866-876 (2012).
- 25 12. Aquino-Galvez, A. *et al.* Dysregulated expression of hypoxia-inducible factors  
26 augments myofibroblasts differentiation in idiopathic pulmonary fibrosis. *Respir Res*  
27 **20**, 130 (2019).
- 28 13. Russell, S., Gatenby, R.A., Gillies, R.J. & Ibrahim-Hashim, A. Chapter 4 -  
29 Pseudohypoxia: Life at the Edge, in *Ecology and Evolution of Cancer*. (eds. B. Ujvari,  
30 B. Roche & F. Thomas) 57-68 (Academic Press, 2017).
- 31 14. Buffa, F.M., Harris, A.L., West, C.M. & Miller, C.J. Large meta-analysis of multiple  
32 cancers reveals a common, compact and highly prognostic hypoxia metagene. *Br J*  
33 *Cancer* **102**, 428-435 (2010).
- 34 15. Elkins, J.M. *et al.* Structure of factor-inhibiting hypoxia-inducible factor (HIF) reveals  
35 mechanism of oxidative modification of HIF-1 alpha. *J Biol Chem* **278**, 1802-1806  
36 (2003).
- 37 16. Hewitson, K.S. *et al.* Hypoxia-inducible factor (HIF) asparagine hydroxylase is  
38 identical to factor inhibiting HIF (FIH) and is related to the cupin structural family. *J*  
39 *Biol Chem* **277**, 26351-26355 (2002).
- 40 17. Lando, D. *et al.* FIH-1 is an asparaginyl hydroxylase enzyme that regulates the  
41 transcriptional activity of hypoxia-inducible factor. *Genes Dev* **16**, 1466-1471 (2002).
- 42 18. Mahon, P.C., Hirota, K. & Semenza, G.L. FIH-1: a novel protein that interacts with  
43 HIF-1alpha and VHL to mediate repression of HIF-1 transcriptional activity. *Genes*  
44 *Dev* **15**, 2675-2686 (2001).
- 45 19. McNeill, L.A. *et al.* Hypoxia-inducible factor asparaginyl hydroxylase (FIH-1) catalyses  
46 hydroxylation at the beta-carbon of asparagine-803. *Biochem J* **367**, 571-575 (2002).

- 1 20. Masson, N. *et al.* The FIH hydroxylase is a cellular peroxide sensor that modulates  
2 HIF transcriptional activity. *EMBO Rep* **13**, 251-257 (2012).
- 3 21. Bracken, C.P. *et al.* Cell-specific regulation of hypoxia-inducible factor (HIF)-1alpha  
4 and HIF-2alpha stabilization and transactivation in a graded oxygen environment. *J*  
5 *Biol Chem* **281**, 22575-22585 (2006).
- 6 22. Stolze, I.P. *et al.* Genetic analysis of the role of the asparaginyl hydroxylase factor  
7 inhibiting hypoxia-inducible factor (FIH) in regulating hypoxia-inducible factor (HIF)  
8 transcriptional target genes [corrected]. *J Biol Chem* **279**, 42719-42725 (2004).
- 9 23. Wang, Y., Zhong, S., Schofield, C.J., Ratcliffe, P.J. & Lu, X. Nuclear entry and export of  
10 FIH are mediated by HIF1alpha and exportin1, respectively. *J Cell Sci* **131** (2018).
- 11 24. Tan, E.Y. *et al.* Cytoplasmic location of factor-inhibiting hypoxia-inducible factor is  
12 associated with an enhanced hypoxic response and a shorter survival in invasive  
13 breast cancer. *Breast Cancer Res* **9**, R89 (2007).
- 14 25. Kroeze, S.G. *et al.* Expression of nuclear FIH independently predicts overall survival of  
15 clear cell renal cell carcinoma patients. *Eur J Cancer* **46**, 3375-3382 (2010).
- 16 26. Coleman, M.L. *et al.* Asparaginyl hydroxylation of the Notch ankyrin repeat domain  
17 by factor inhibiting hypoxia-inducible factor. *J Biol Chem* **282**, 24027-24038 (2007).
- 18 27. Lancaster, J.A. *et al.* Carbonic anhydrase (CA IX) expression, a potential new intrinsic  
19 marker of hypoxia: correlations with tumor oxygen measurements and prognosis in  
20 locally advanced carcinoma of the cervix. *Cancer Res* **61**, 6394-6399 (2001).
- 21 28. Habermann, A.C. *et al.* Single-cell RNA sequencing reveals profibrotic roles of distinct  
22 epithelial and mesenchymal lineages in pulmonary fibrosis. *Sci Adv* **6**, eaba1972  
23 (2020).
- 24 29. Cheresh, P., Kim, S.J., Tulasiram, S. & Kamp, D.W. Oxidative stress and pulmonary  
25 fibrosis. *Biochim Biophys Acta* **1832**, 1028-1040 (2013).
- 26 30. Basu, R.K. *et al.* Interdependence of HIF-1alpha and TGF-beta/Smad3 signaling in  
27 normoxic and hypoxic renal epithelial cell collagen expression. *Am J Physiol Renal*  
28 *Physiol* **300**, F898-905 (2011).
- 29 31. Rosell-Garcia, T., Palomo-Alvarez, O. & Rodriguez-Pascual, F. A hierarchical network  
30 of hypoxia-inducible factor and SMAD proteins governs procollagen lysyl hydroxylase  
31 2 induction by hypoxia and transforming growth factor beta1. *J Biol Chem* **294**,  
32 14308-14318 (2019).
- 33 32. Higgins, D.F. *et al.* Hypoxia promotes fibrogenesis in vivo via HIF-1 stimulation of  
34 epithelial-to-mesenchymal transition. *J Clin Invest* **117**, 3810-3820 (2007).
- 35 33. Senavirathna, L.K. *et al.* Hypoxia induces pulmonary fibroblast proliferation through  
36 NFAT signaling. *Sci Rep* **8**, 2709 (2018).
- 37 34. Goodwin, J. *et al.* Targeting Hypoxia-Inducible Factor-1alpha/Pyruvate  
38 Dehydrogenase Kinase 1 Axis by Dichloroacetate Suppresses Bleomycin-induced  
39 Pulmonary Fibrosis. *Am J Respir Cell Mol Biol* **58**, 216-231 (2018).
- 40 35. Senavirathna, L.K., Huang, C., Pushparaj, S., Xu, D. & Liu, L. Hypoxia and transforming  
41 growth factor beta1 regulation of long non-coding RNA transcriptomes in human  
42 pulmonary fibroblasts. *Physiol Rep* **8**, e14343 (2020).
- 43 36. Qian, F. *et al.* Cross regulation between hypoxia-inducible transcription factor-1alpha  
44 (HIF-1alpha) and transforming growth factor (TGF)-ss1 mediates nickel oxide  
45 nanoparticles (NiONPs)-induced pulmonary fibrosis. *Am J Transl Res* **7**, 2364-2378  
46 (2015).

- 1 37. Ueno, M. *et al.* Hypoxia-inducible factor-1 $\alpha$  mediates TGF- $\beta$ -induced PAI-1  
2 production in alveolar macrophages in pulmonary fibrosis. *Am J Physiol Lung Cell Mol*  
3 *Physiol* **300**, L740-752 (2011).
- 4 38. Purnomo, Y., Piccart, Y., Coenen, T., Prihadi, J.S. & Lijnen, P.J. Oxidative stress and  
5 transforming growth factor- $\beta$ 1-induced cardiac fibrosis. *Cardiovasc Hematol*  
6 *Disord Drug Targets* **13**, 165-172 (2013).
- 7 39. Sanchez-Valle, V., Chavez-Tapia, N.C., Uribe, M. & Mendez-Sanchez, N. Role of  
8 oxidative stress and molecular changes in liver fibrosis: a review. *Curr Med Chem* **19**,  
9 4850-4860 (2012).
- 10 40. Zhang, N. *et al.* The asparaginyl hydroxylase factor inhibiting HIF-1 $\alpha$  is an  
11 essential regulator of metabolism. *Cell metabolism* **11**, 364-378 (2010).
- 12 41. Scholz, C.C. *et al.* FIH Regulates Cellular Metabolism through Hydroxylation of the  
13 Deubiquitinase OTUB1. *PLoS biology* **14**, e1002347 (2016).
- 14 42. Peng, H. *et al.* MicroRNA-31 targets FIH-1 to positively regulate corneal epithelial  
15 glycogen metabolism. *FASEB journal : official publication of the Federation of*  
16 *American Societies for Experimental Biology* **26**, 3140-3147 (2012).
- 17 43. Sim, J. *et al.* The Factor Inhibiting HIF Asparaginyl Hydroxylase Regulates Oxidative  
18 Metabolism and Accelerates Metabolic Adaptation to Hypoxia. *Cell metabolism* **27**,  
19 898-913 e897 (2018).
- 20 44. Peng, H. *et al.* microRNA-31/factor-inhibiting hypoxia-inducible factor 1 nexus  
21 regulates keratinocyte differentiation. *Proceedings of the National Academy of*  
22 *Sciences of the United States of America* **109**, 14030-14034 (2012).
- 23 45. Kiriakidis, S. *et al.* Factor-inhibiting HIF-1 (FIH-1) is required for human vascular  
24 endothelial cell survival. *FASEB journal : official publication of the Federation of*  
25 *American Societies for Experimental Biology* **29**, 2814-2827 (2015).
- 26 46. Pelletier, J. *et al.* The asparaginyl hydroxylase factor-inhibiting HIF is essential for  
27 tumor growth through suppression of the p53-p21 axis. *Oncogene* **31**, 2989-3001  
28 (2012).
- 29 47. Kuzmanov, A., Wielockx, B., Rezaei, M., Kettelhake, A. & Breier, G. Overexpression of  
30 factor inhibiting HIF-1 enhances vessel maturation and tumor growth via platelet-  
31 derived growth factor-C. *International journal of cancer* **131**, E603-613 (2012).
- 32 48. Kang, J. *et al.* FIH is an oxygen sensor in ovarian cancer for G9a/GLP-driven  
33 epigenetic regulation of metastasis-related genes. *Cancer research* (2017).
- 34 49. Rodriguez, J. *et al.* Substrate-Trapped Interactors of PHD3 and FIH Cluster in Distinct  
35 Signaling Pathways. *Cell reports* **14**, 2745-2760 (2016).
- 36 50. Conforti, F. *et al.* Paracrine SPARC signaling dysregulates alveolar epithelial barrier  
37 integrity and function in lung fibrosis. *Cell Death Discov* **6**, 54 (2020).
- 38 51. Hill, C. *et al.* Autophagy inhibition-mediated epithelial-mesenchymal transition  
39 augments local myofibroblast differentiation in pulmonary fibrosis. *Cell Death Dis* **10**,  
40 591 (2019).
- 41 52. Hanzelmann, S., Castelo, R. & Guinney, J. GSEA: gene set variation analysis for  
42 microarray and RNA-seq data. *BMC Bioinformatics* **14**, 7 (2013).
- 43 53. Wang, Y., Zhong, S., Schofield, C.J., Ratcliffe, P.J. & Lu, X. Nuclear entry and export of  
44 FIH are mediated by HIF1 $\alpha$  and exportin1, respectively. *Journal of cell science* **131**  
45 (2018).
- 46



1 **Supplementary figure 1. Correlation of PLOD2 with LOXL family members.**

2 (A-D) Scatterplots of paired data from (Figure 1 A-B, D-F) comparing gene expression within  
3 fibroblast foci (n=10 donors) of *PLOD2* with *LOX*, *LOXL1*, *LOXL3* and *LOXL4*. (E) Scatterplot  
4 comparing gene expression within fibroblast foci (n=10 donors) of *LOXL2* and *COL1A1*  
5 expression. Relative expression levels are calculated as Fragments Per Kilobase of transcript  
6 per Million mapped reads (FPKM). Strength of correlation calculated using Spearman  
7 correlation coefficient.

8

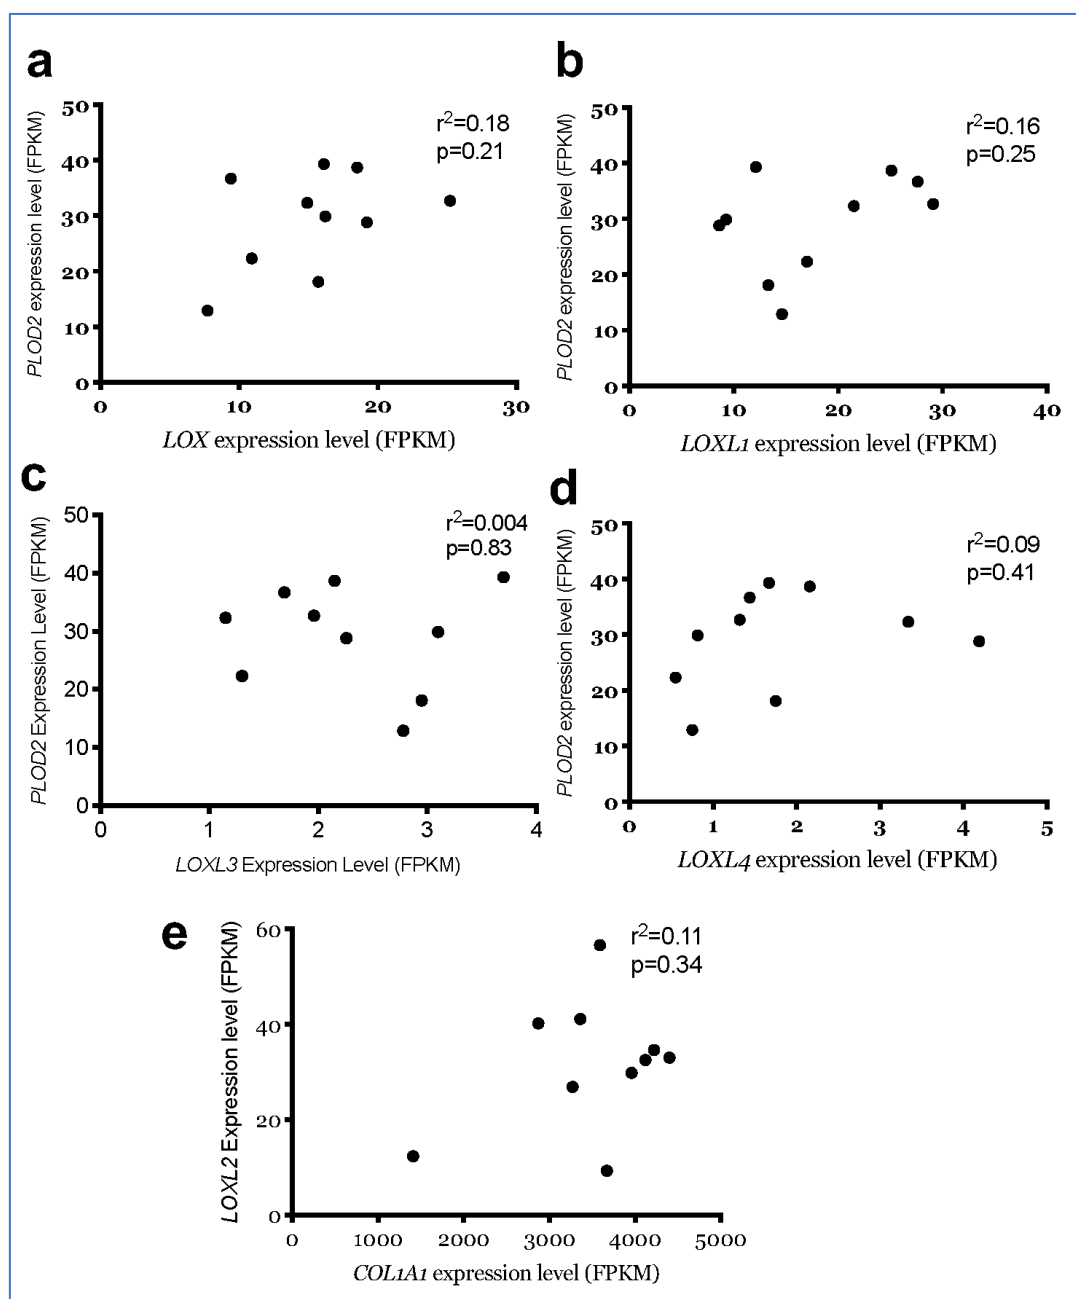

1 **Supplementary figure 2. Pro-fibrotic signalling pathways in human lung fibroblasts.**  
 2 (A-B) Healthy lung fibroblasts exposed to control, EGF, TGFβ1, DMOG, Wnt3α or Wnt5α  
 3 signalling for 24, 48 or 72 hours. n=3 independent experiments. (A) Protein expression of  
 4 phosphor-ERK, phosphor-SMAD2/3, HIF1α and active β-catenin at 24 hours of exposure to  
 5 conditions. β-tubulin was used as a loading control. The full blots are shown in Supplementary  
 6 figure 2-source data 1. (B) Expression of COL3A1 in healthy lung fibroblasts exposed to  
 7 conditions for 24, 48 or 72 hours using the ΔΔCt method. Bars indicate geometric means.  
 8 \*\*\*\*p<0.0001 by Dunnett's multiple comparisons test. (C) Protein expression of HIF1α, LOXL2  
 9 and PLOD2 in IPF fibroblasts exposed to control media or IOX2 for 24, 48 or 72 hours. β-actin  
 10 was used as a loading control. The full blots are shown in Supplementary figure 2-source data  
 11 1. (D) Fold change in mRNA levels of *LOXL2*, *PLOD2* and the HIF pathway activation marker  
 12 gene carbonic anhydrase IX/9 (*CA9*) in MRC5 fibroblasts after incubation in normoxia (21% O<sub>2</sub>)  
 13 or hypoxia (1% O<sub>2</sub>) for 24 hours. β-actin-normalised mRNA levels under normoxia were used  
 14 to set the baseline value at unity. Data are mean ± s.d. n = 3 samples per group. \*\*\*\*p<0.0001  
 15 using unpaired t test.  
 16

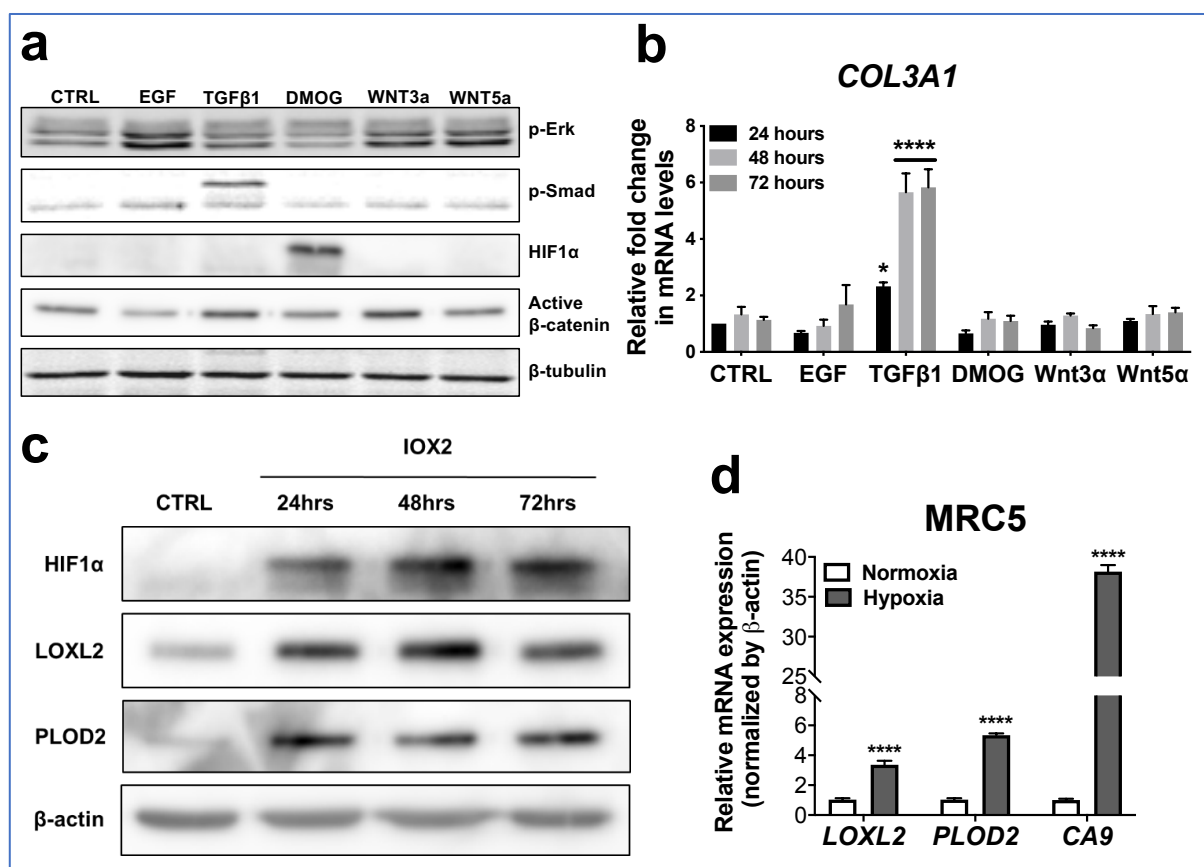



1 **Supplementary figure 3: TGF $\beta$ 1 promotes interstitial collagen gene expression in lung**  
2 **fibroblasts**

3 Relative gene expression of *COL1A1* in lung fibroblasts from IPF donors (n=3) exposed to 48  
4 hours of control media, TGF $\beta$ 1, DMOG or combined TGF $\beta$ 1 and DMOG conditions using the  
5  $\Delta\Delta$ Ct method. Bars indicate geometric means. \*p<0.05 by Dunnett's multiple comparisons  
6 test.

7

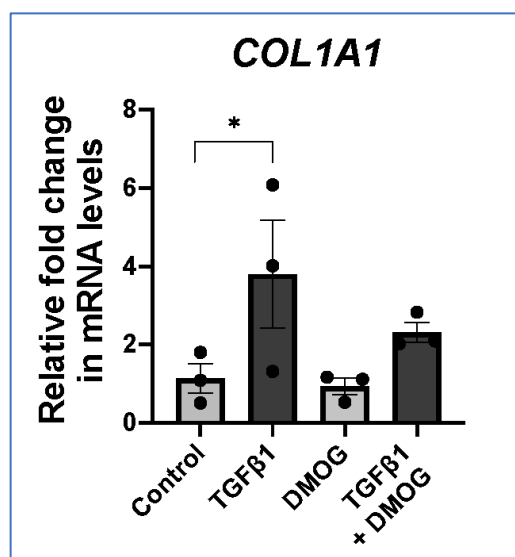

1 **Supplementary figure 4: IOX2-mediated HIF pathway activation promotes PLOD2 and**  
2 **LOXL2 expression in the 3D *in vitro* model of fibrosis**

3 Lung fibroblasts from IPF patients were used in the 3D model of fibrosis in the presence of  
4 IOX2 or vehicle control as indicated. Protein expression of (A) HIF1 $\alpha$ , PLOD2 and (B) LOXL2  
5 following two weeks of culture in the presence or absence of TGF $\beta$ 1 with or without IOX2 (50  
6  $\mu$ M or 250  $\mu$ M) or vehicle control.  $\beta$ -actin loading control. Blots representative of experiments  
7 from 2 separate IPF donors. The full blots are shown in Supplementary figure 4-source data 1.  
8

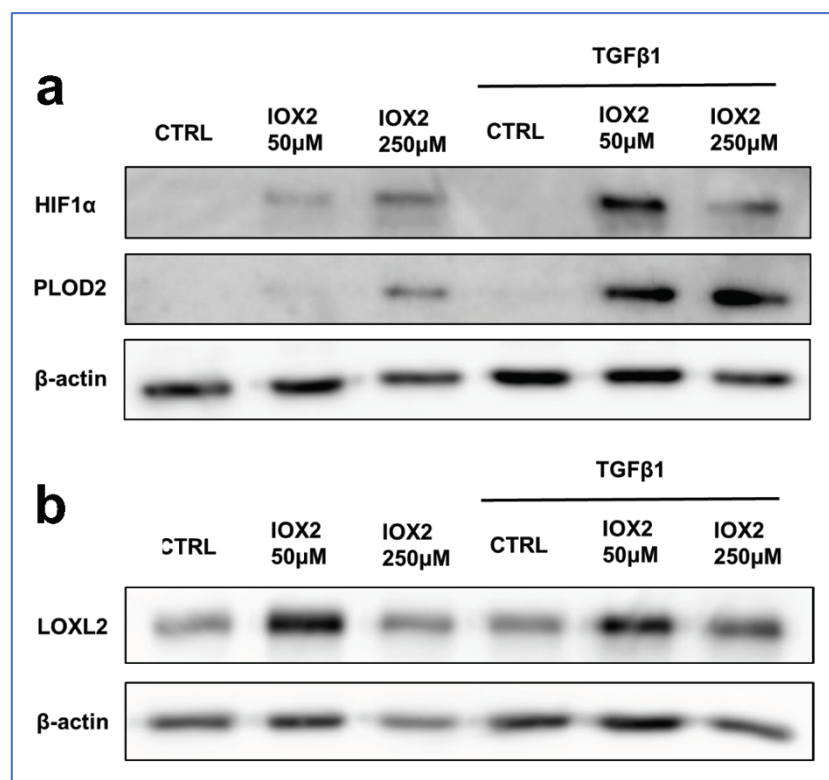

- 1 **Supplementary figure 5:** Diagram explaining the luciferase assays in Fig. 6D and E. In brief,
- 2 active FIH asparaginyl hydroxylates HIF1 $\alpha$ , inhibiting the binding of CBP/p300 and inactivating
- 3 the luciferase activity. When FIH is inhibited, non-hydroxylated HIF1 $\alpha$  binding with CBP/p300
- 4 augments luciferase activity.
- 5

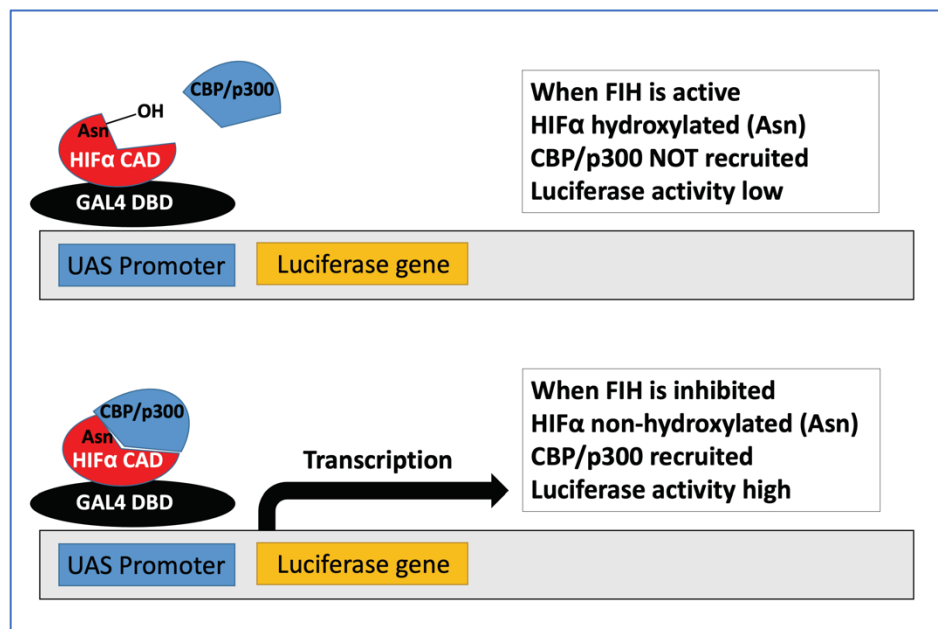

1 **Supplementary figure 6: Fibroblast populations identified within a single-cell RNA**  
2 **sequencing dataset**

3 (A) t-stochastic nearest neighbour embedding (t-SNE) of single cell sequencing data  
4 (GSE135893) showing clustering of different lung fibroblast types. (B) t-SNE plot of single cell  
5 fibroblast data showing diagnosis of the patients of origin for each fibroblast.  
6

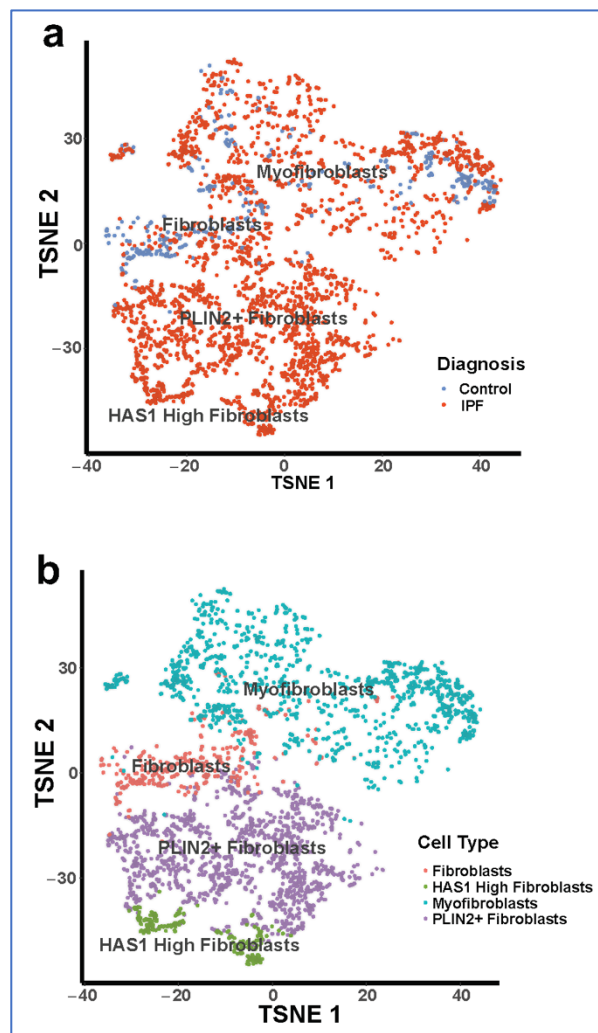

- 1 **Source Data Files**
- 2 Figure 2—source data 1. Full membrane scans for western blot images for Figure 2c.
- 3 Figure 3—source data 1. Full membrane scans for western blot images for Figure 3d.
- 4 Figure 4—source data 1. Full membrane scans for western blot images for Figure 4a.
- 5 Figure 6—source data 1. Full membrane scans for western blot images for Figure 6.
- 6 Supplementary Figure 2—source data 1. Full membrane scans for western blot images for
- 7 Supplementary Figure 2a,c.
- 8 Supplementary Figure 4—source data 1. Full membrane scans for western blot images for
- 9 Supplementary Figure 4a,b.
- 10 Source code 1. Source code for RNAseq analyses for Figure 6a,b
- 11 Source code 2. Source code for RNAseq analyses for Figure 7a,b
- 12 Source code 3. Source code for RNAseq analyses for Figure 8
